# Supplementary material
Source: MDPI journal article supplement (https://www.mdpi.com/2073-4395/12/12/3056)
Supplement: s1 [file s1]

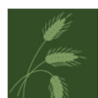

**Table S1:** Material information in ex situ conservation of DXWR.

| No.  | Name | Origin or source of population | No.  | Name  | Origin or source of population | No.  | Name  | Origin or source of population |
|------|------|--------------------------------|------|-------|--------------------------------|------|-------|--------------------------------|
| 1-1  | DY1  | Dongtangshang                  | 3-26 | DY75  | Dongtang                       | 6-13 | DY148 | Dongtangxia                    |
| 1-2  | DY2  | Dongtangshang                  | 3-27 | DY76  | Dongtang                       | 6-14 | DY149 | Dongtangxia                    |
| 1-3  | DY3  | Dongtangshang                  | 3-28 | DY77  | Dongtang                       | 6-15 | DY150 | Dongtangxia                    |
| 1-4  | DY4  | Dongtangshang                  | 3-29 | DY78  | Dongtang                       | 6-16 | DY151 | Dongtangxia                    |
| 1-5  | DY5  | Dongtangshang                  | 3-30 | DY79  | Dongtang                       | 6-17 | DY152 | Dongtangxia                    |
| 1-6  | DY6  | Dongtangshang                  | 4-1  | DY80  | Shuitaoshu                     | 6-18 | DY153 | Dongtangxia                    |
| 1-7  | DY7  | Dongtangshang                  | 4-2  | DY81  | Shuitaoshu                     | 6-19 | DY154 | Dongtangxia                    |
| 1-8  | DY8  | Dongtangshang                  | 4-3  | DY82  | Shuitaoshu                     | 6-20 | DY155 | Dongtangxia                    |
| 1-9  | DY9  | Dongtangshang                  | 4-4  | DY83  | Shuitaoshu                     | 6-21 | DY156 | Dongtangxia                    |
| 1-10 | DY10 | Dongtangshang                  | 4-5  | DY84  | Shuitaoshu                     | 6-22 | DY157 | Dongtangxia                    |
| 1-11 | DY11 | Dongtangshang                  | 4-6  | DY85  | Shuitaoshu                     | 6-23 | DY158 | Dongtangxia                    |
| 1-12 | DY12 | Dongtangshang                  | 4-7  | DY86  | Shuitaoshu                     | 6-24 | DY159 | Dongtangxia                    |
| 1-13 | DY13 | Dongtangshang                  | 4-8  | DY87  | Shuitaoshu                     | 6-25 | DY160 | Dongtangxia                    |
| 1-14 | DY14 | Dongtangshang                  | 4-9  | DY88  | Shuitaoshu                     | 6-26 | DY161 | Dongtangxia                    |
| 1-15 | DY15 | Dongtangshang                  | 4-10 | DY89  | Shuitaoshu                     | 6-27 | DY162 | Dongtangxia                    |
| 1-16 | DY16 | Dongtangshang                  | 4-11 | DY90  | Shuitaoshu                     | 7-1  | DY163 | Dongtangxice                   |
| 1-17 | DY17 | Dongtangshang                  | 4-12 | DY91  | Shuitaoshu                     | 7-2  | DY164 | Dongtangxice                   |
| 1-18 | DY18 | Dongtangshang                  | 4-13 | DY92  | Shuitaoshu                     | 7-3  | DY165 | Dongtangxice                   |
| 1-19 | DY19 | Dongtangshang                  | 4-14 | DY93  | Shuitaoshu                     | 7-4  | DY166 | Dongtangxice                   |
| 1-20 | DY20 | Dongtangshang                  | 4-15 | DY94  | Shuitaoshu                     | 7-5  | DY167 | Dongtangxice                   |
| 2-1  | DY21 | Zhangtang                      | 4-16 | DY95  | Shuitaoshu                     | 7-6  | DY168 | Dongtangxice                   |
| 2-2  | DY22 | Zhangtang                      | 4-17 | DY96  | Shuitaoshu                     | 7-7  | DY169 | Dongtangxice                   |
| 2-3  | DY23 | Zhangtang                      | 4-18 | DY97  | Shuitaoshu                     | 7-8  | DY170 | Dongtangxice                   |
| 2-4  | DY24 | Zhangtang                      | 4-19 | DY98  | Shuitaoshu                     | 7-9  | DY171 | Dongtangxice                   |
| 2-5  | DY25 | Zhangtang                      | 4-20 | DY99  | Shuitaoshu                     | 7-10 | DY172 | Dongtangxice                   |
| 2-6  | DY26 | Zhangtang                      | 4-21 | DY100 | Shuitaoshu                     | 7-11 | DY173 | Dongtangxice                   |
| 2-7  | DY27 | Zhangtang                      | 4-22 | DY101 | Shuitaoshu                     | 7-12 | DY174 | Dongtangxice                   |
| 2-8  | DY28 | Zhangtang                      | 4-23 | DY102 | Shuitaoshu                     | 7-13 | DY175 | Dongtangxice                   |
| 2-9  | DY29 | Zhangtang                      | 4-24 | DY103 | Shuitaoshu                     | 7-14 | DY176 | Dongtangxice                   |
| 2-10 | DY30 | Zhangtang                      | 4-25 | DY104 | Shuitaoshu                     | 7-15 | DY177 | Dongtangxice                   |
| 2-11 | DY31 | Zhangtang                      | 4-26 | DY105 | Shuitaoshu                     | 8-1  | DY178 | Anjiashan                      |
| 2-12 | DY32 | Zhangtang                      | 4-27 | DY106 | Shuitaoshu                     | 8-2  | DY179 | Anjiashan                      |
| 2-13 | DY33 | Zhangtang                      | 4-28 | DY107 | Shuitaoshu                     | 8-3  | DY180 | Anjiashan                      |
| 2-14 | DY34 | Zhangtang                      | 4-29 | DY108 | Shuitaoshu                     | 8-4  | DY181 | Anjiashan                      |
| 2-15 | DY35 | Zhangtang                      | 4-30 | DY109 | Shuitaoshu                     | 8-5  | DY182 | Anjiashan                      |
| 2-16 | DY36 | Zhangtang                      | 4-31 | DY110 | Shuitaoshu                     | 8-6  | DY183 | Anjiashan                      |
| 2-17 | DY37 | Zhangtang                      | 4-32 | DY111 | Shuitaoshu                     | 8-7  | DY184 | Anjiashan                      |
| 2-18 | DY38 | Zhangtang                      | 4-33 | DY112 | Shuitaoshu                     | 8-8  | DY185 | Anjiashan                      |
| 2-19 | DY39 | Zhangtang                      | 5-1  | DY113 | Linchang                       | 8-9  | DY186 | Anjiashan                      |
| 2-20 | DY40 | Zhangtang                      | 5-2  | DY114 | Linchang                       | 8-10 | DY187 | Anjiashan                      |
| 2-21 | DY41 | Zhangtang                      | 5-3  | DY115 | Linchang                       | 8-11 | DY188 | Anjiashan                      |

|      |      |           |      |       |             |      |       |            |
|------|------|-----------|------|-------|-------------|------|-------|------------|
| 2-22 | DY42 | Zhangtang | 5-4  | DY116 | Linchang    | 8-12 | DY189 | Anjiashan  |
| 2-23 | DY43 | Zhangtang | 5-5  | DY117 | Linchang    | 8-13 | DY190 | Anjiashan  |
| 2-24 | DY44 | Zhangtang | 5-6  | DY118 | Linchang    | 8-14 | DY191 | Anjiashan  |
| 2-25 | DY45 | Zhangtang | 5-7  | DY119 | Linchang    | 8-15 | DY192 | Anjiashan  |
| 2-26 | DY46 | Zhangtang | 5-8  | DY120 | Linchang    | 8-16 | DY193 | Anjiashan  |
| 2-27 | DY47 | Zhangtang | 5-9  | DY121 | Linchang    | 8-17 | DY194 | Anjiashan  |
| 2-28 | DY48 | Zhangtang | 5-10 | DY122 | Linchang    | 8-18 | DY195 | Anjiashan  |
| 2-29 | DY49 | Zhangtang | 5-11 | DY123 | Linchang    | 8-19 | DY196 | Anjiashan  |
| 3-1  | DY50 | Dongtang  | 5-12 | DY124 | Linchang    | 8-20 | DY197 | Anjiashan  |
| 3-2  | DY51 | Dongtang  | 5-13 | DY125 | Linchang    | 8-21 | DY198 | Anjiashan  |
| 3-3  | DY52 | Dongtang  | 5-14 | DY126 | Linchang    | 8-22 | DY199 | Anjiashan  |
| 3-4  | DY53 | Dongtang  | 5-15 | DY127 | Linchang    | 8-23 | DY200 | Anjiashan  |
| 3-5  | DY54 | Dongtang  | 5-16 | DY128 | Linchang    | 8-24 | DY201 | Anjiashan  |
| 3-6  | DY55 | Dongtang  | 5-17 | DY129 | Linchang    | 9-1  | DY202 | Kanxialong |
| 3-7  | DY56 | Dongtang  | 5-18 | DY130 | Linchang    | 9-2  | DY203 | Kanxialong |
| 3-8  | DY57 | Dongtang  | 5-19 | DY131 | Linchang    | 9-3  | DY204 | Kanxialong |
| 3-9  | DY58 | Dongtang  | 5-20 | DY132 | Linchang    | 9-4  | DY205 | Kanxialong |
| 3-10 | DY59 | Dongtang  | 5-21 | DY133 | Linchang    | 9-5  | DY206 | Kanxialong |
| 3-11 | DY60 | Dongtang  | 5-22 | DY134 | Linchang    | 9-6  | DY207 | Kanxialong |
| 3-12 | DY61 | Dongtang  | 5-23 | DY135 | Linchang    | 9-7  | DY208 | Kanxialong |
| 3-14 | DY63 | Dongtang  | 6-1  | DY136 | Dongtangxia | 9-8  | DY209 | Kanxialong |
| 3-15 | DY64 | Dongtang  | 6-2  | DY137 | Dongtangxia | 9-9  | DY210 | Kanxialong |
| 3-16 | DY65 | Dongtang  | 6-3  | DY138 | Dongtangxia | 9-10 | DY211 | Kanxialong |
| 3-17 | DY66 | Dongtang  | 6-4  | DY139 | Dongtangxia | 9-11 | DY212 | Kanxialong |
| 3-18 | DY67 | Dongtang  | 6-5  | DY140 | Dongtangxia | 9-12 | DY213 | Kanxialong |
| 3-19 | DY68 | Dongtang  | 6-6  | DY141 | Dongtangxia | 9-13 | DY214 | Kanxialong |
| 3-20 | DY69 | Dongtang  | 6-7  | DY142 | Dongtangxia | 9-14 | DY215 | Kanxialong |
| 3-21 | DY70 | Dongtang  | 6-8  | DY143 | Dongtangxia | 9-15 | DY216 | Kanxialong |
| 3-22 | DY71 | Dongtang  | 6-9  | DY144 | Dongtangxia | 9-16 | DY217 | Kanxialong |
| 3-23 | DY72 | Dongtang  | 6-10 | DY145 | Dongtangxia | 9-17 | DY218 | Kanxialong |
| 3-24 | DY73 | Dongtang  | 6-11 | DY146 | Dongtangxia | 9-18 | DY219 | Kanxialong |
| 3-25 | DY74 | Dongtang  | 6-12 | DY147 | Dongtangxia | 9-19 | DY220 | Kanxialong |

**Table S2:** The alignment rate for each sample.

| ID  | Total reads | No. uniquely mapped | % uniquely mapped | No. repeatedly mapped | % repeatedly mapped | No. un-mapped | % un-mapped |
|-----|-------------|---------------------|-------------------|-----------------------|---------------------|---------------|-------------|
| 1-1 | 19,918,039  | 15,310,784          | 76.87%            | 3,515,481             | 17.65%              | 1,091,774     | 5.48%       |
| 1-2 | 17,352,739  | 13,016,738          | 75.01%            | 3,368,929             | 19.41%              | 967,072       | 5.57%       |
| 1-3 | 25,748,498  | 18,997,168          | 73.78%            | 5,418,386             | 21.04%              | 1,332,944     | 5.18%       |
| 1-4 | 18,760,209  | 14,091,472          | 75.11%            | 3,653,572             | 19.48%              | 1,015,165     | 5.41%       |
| 1-5 | 19,683,965  | 14,767,146          | 75.02%            | 3,803,875             | 19.32%              | 1,112,944     | 5.65%       |
| 1-6 | 29,738,970  | 22,933,036          | 77.11%            | 5,361,721             | 18.03%              | 1,444,213     | 4.86%       |
| 1-7 | 16,691,695  | 12,366,360          | 74.09%            | 3,418,082             | 20.48%              | 907,253       | 5.44%       |
| 1-8 | 20,191,159  | 14,789,062          | 73.25%            | 4,303,050             | 21.31%              | 1,099,047     | 5.44%       |
| 1-9 | 19,580,411  | 14,508,387          | 74.10%            | 3,980,098             | 20.33%              | 1,091,926     | 5.58%       |

|      |            |            |        |           |        |           |       |
|------|------------|------------|--------|-----------|--------|-----------|-------|
| 1-10 | 24,632,793 | 18,475,100 | 75.00% | 4,784,133 | 19.42% | 1,373,560 | 5.58% |
| 1-11 | 18,023,537 | 13,334,063 | 73.98% | 3,755,852 | 20.84% | 933,622   | 5.18% |
| 1-12 | 20,069,433 | 14,951,776 | 74.50% | 3,996,665 | 19.91% | 1,120,992 | 5.59% |
| 1-13 | 19,781,098 | 14,872,804 | 75.19% | 3,899,096 | 19.71% | 1,009,198 | 5.10% |
| 1-14 | 19,649,095 | 15,074,307 | 76.72% | 3,397,432 | 17.29% | 1,177,356 | 5.99% |
| 1-15 | 16,828,397 | 12,561,678 | 74.65% | 3,368,241 | 20.02% | 898,478   | 5.34% |
| 1-16 | 17,019,781 | 13,167,087 | 77.36% | 3,021,474 | 17.75% | 831,220   | 4.88% |
| 1-17 | 17,788,968 | 13,473,808 | 75.74% | 3,237,117 | 18.20% | 1,078,043 | 6.06% |
| 1-18 | 20,162,956 | 15,265,122 | 75.71% | 3,742,968 | 18.56% | 1,154,866 | 5.73% |
| 1-19 | 41,795,091 | 32,041,720 | 76.66% | 7,486,748 | 17.91% | 2,266,623 | 5.42% |
| 1-20 | 38,828,166 | 29,740,122 | 76.59% | 6,783,168 | 17.47% | 2,304,876 | 5.94% |
| 2-1  | 20,658,114 | 14,943,913 | 72.34% | 4,580,001 | 22.17% | 1,134,200 | 5.49% |
| 2-2  | 20,858,829 | 15,728,147 | 75.40% | 3,966,821 | 19.02% | 1,163,861 | 5.58% |
| 2-3  | 17,867,017 | 12,609,898 | 70.58% | 4,306,753 | 24.10% | 950,366   | 5.32% |
| 2-4  | 38,853,074 | 29,615,897 | 76.23% | 7,128,932 | 18.35% | 2,108,245 | 5.43% |
| 2-5  | 19,490,339 | 14,236,651 | 73.04% | 4,217,944 | 21.64% | 1,035,744 | 5.31% |
| 2-6  | 20,145,591 | 15,307,853 | 75.99% | 3,746,261 | 18.60% | 1,091,477 | 5.42% |
| 2-7  | 17,139,641 | 12,637,658 | 73.73% | 3,628,492 | 21.17% | 873,491   | 5.10% |
| 2-8  | 20,957,692 | 15,606,415 | 74.47% | 4,130,573 | 19.71% | 1,220,704 | 5.82% |
| 2-9  | 26,579,563 | 20,111,364 | 75.66% | 5,041,486 | 18.97% | 1,426,713 | 5.37% |
| 2-10 | 20,329,219 | 15,616,396 | 76.82% | 3,679,351 | 18.10% | 1,033,472 | 5.08% |
| 2-11 | 31,854,805 | 23,960,817 | 75.22% | 6,277,014 | 19.71% | 1,616,974 | 5.08% |
| 2-12 | 20,842,035 | 15,587,386 | 74.79% | 4,174,840 | 20.03% | 1,079,809 | 5.18% |
| 2-13 | 19,615,671 | 15,164,173 | 77.31% | 3,422,031 | 17.45% | 1,029,467 | 5.25% |
| 2-14 | 23,649,978 | 16,905,249 | 71.48% | 5,480,214 | 23.17% | 1,264,515 | 5.35% |
| 2-15 | 22,986,718 | 17,260,582 | 75.09% | 4,536,029 | 19.73% | 1,190,107 | 5.18% |
| 2-16 | 20,685,008 | 15,501,130 | 74.94% | 4,052,282 | 19.59% | 1,131,596 | 5.47% |
| 2-17 | 35,549,815 | 26,718,204 | 75.16% | 7,064,808 | 19.87% | 1,766,803 | 4.97% |
| 2-18 | 20,176,135 | 15,118,044 | 74.93% | 3,932,311 | 19.49% | 1,125,780 | 5.58% |
| 2-19 | 18,912,517 | 14,257,864 | 75.39% | 3,585,145 | 18.96% | 1,069,508 | 5.66% |
| 2-20 | 18,534,338 | 13,819,293 | 74.56% | 3,733,878 | 20.15% | 981,167   | 5.29% |
| 2-21 | 20,290,205 | 14,820,373 | 73.04% | 4,373,666 | 21.56% | 1,096,166 | 5.40% |
| 2-22 | 18,546,597 | 13,722,168 | 73.99% | 3,736,864 | 20.15% | 1,087,565 | 5.86% |
| 2-23 | 30,890,557 | 22,866,855 | 74.03% | 6,360,011 | 20.59% | 1,663,691 | 5.39% |
| 2-24 | 19,574,172 | 14,531,724 | 74.24% | 3,979,580 | 20.33% | 1,062,868 | 5.43% |
| 2-25 | 21,921,263 | 16,309,976 | 74.40% | 4,424,365 | 20.18% | 1,186,922 | 5.41% |
| 2-26 | 19,559,275 | 14,473,158 | 74.00% | 3,952,074 | 20.21% | 1,134,043 | 5.80% |
| 2-27 | 19,193,474 | 13,958,519 | 72.73% | 4,060,796 | 21.16% | 1,174,159 | 6.12% |
| 2-28 | 16,775,444 | 12,877,017 | 76.76% | 3,045,504 | 18.15% | 852,923   | 5.08% |
| 2-29 | 18,131,639 | 13,877,320 | 76.54% | 3,137,275 | 17.30% | 1,117,044 | 6.16% |
| 3-1  | 26,569,653 | 20,359,799 | 76.63% | 4,795,416 | 18.05% | 1,414,438 | 5.32% |
| 3-2  | 27,653,479 | 20,771,618 | 75.11% | 5,415,980 | 19.59% | 1,465,881 | 5.30% |
| 3-3  | 17,777,653 | 13,624,533 | 76.64% | 3,177,070 | 17.87% | 976,050   | 5.49% |
| 3-4  | 23,567,978 | 17,681,940 | 75.03% | 4,682,639 | 19.87% | 1,203,399 | 5.11% |
| 3-5  | 22,225,138 | 16,739,995 | 75.32% | 4,328,289 | 19.47% | 1,156,854 | 5.21% |
| 3-6  | 26,788,563 | 20,394,460 | 76.13% | 4,915,918 | 18.35% | 1,478,185 | 5.52% |
| 3-7  | 30,194,924 | 22,947,987 | 76.00% | 5,650,505 | 18.71% | 1,596,432 | 5.29% |
| 3-8  | 25,581,752 | 19,342,593 | 75.61% | 4,756,982 | 18.60% | 1,482,177 | 5.79% |

|      |            |            |        |           |        |           |       |
|------|------------|------------|--------|-----------|--------|-----------|-------|
| 3-9  | 17,383,683 | 13,099,325 | 75.35% | 3,327,910 | 19.14% | 956,448   | 5.50% |
| 3-10 | 18,661,111 | 14,229,162 | 76.25% | 3,232,512 | 17.32% | 1,199,437 | 6.43% |
| 3-11 | 16,509,489 | 12,157,653 | 73.64% | 3,489,265 | 21.13% | 862,571   | 5.22% |
| 3-12 | 24,363,083 | 17,808,882 | 73.10% | 5,149,217 | 21.14% | 1,404,984 | 5.77% |
| 3-13 | 27,052,418 | 20,459,479 | 75.63% | 5,057,560 | 18.70% | 1,535,379 | 5.68% |
| 3-14 | 21,232,044 | 15,779,493 | 74.32% | 4,223,972 | 19.89% | 1,228,579 | 5.79% |
| 3-15 | 20,508,523 | 15,550,579 | 75.82% | 3,822,929 | 18.64% | 1,135,015 | 5.53% |
| 3-16 | 21,887,888 | 16,513,635 | 75.45% | 4,161,150 | 19.01% | 1,213,103 | 5.54% |
| 3-17 | 21,971,757 | 16,304,459 | 74.21% | 4,470,901 | 20.35% | 1,196,397 | 5.45% |
| 3-18 | 27,460,854 | 20,444,074 | 74.45% | 5,512,742 | 20.07% | 1,504,038 | 5.48% |
| 3-19 | 21,223,465 | 15,759,362 | 74.25% | 4,336,826 | 20.43% | 1,127,277 | 5.31% |
| 3-20 | 18,941,997 | 13,892,976 | 73.34% | 3,955,988 | 20.88% | 1,093,033 | 5.77% |
| 3-21 | 19,320,338 | 14,646,231 | 75.81% | 3,595,759 | 18.61% | 1,078,348 | 5.58% |
| 3-22 | 18,755,373 | 13,688,772 | 72.99% | 3,976,559 | 21.20% | 1,090,042 | 5.81% |
| 3-23 | 16,934,443 | 12,573,854 | 74.25% | 3,471,110 | 20.50% | 889,479   | 5.25% |
| 3-24 | 20,332,314 | 15,348,615 | 75.49% | 3,919,438 | 19.28% | 1,064,261 | 5.23% |
| 3-25 | 16,917,656 | 12,465,813 | 73.69% | 3,430,386 | 20.28% | 1,021,457 | 6.04% |
| 3-26 | 20,366,320 | 15,130,130 | 74.29% | 4,049,406 | 19.88% | 1,186,784 | 5.83% |
| 3-27 | 18,450,803 | 13,841,870 | 75.02% | 3,476,717 | 18.84% | 1,132,216 | 6.14% |
| 3-28 | 25,489,054 | 19,016,957 | 74.61% | 5,005,675 | 19.64% | 1,466,422 | 5.75% |
| 3-29 | 19,075,079 | 14,411,593 | 75.55% | 3,524,318 | 18.48% | 1,139,168 | 5.97% |
| 3-30 | 23,482,798 | 17,958,793 | 76.48% | 4,209,031 | 17.92% | 1,314,974 | 5.60% |
| 4-1  | 19,209,356 | 14,558,654 | 75.79% | 3,505,865 | 18.25% | 1,144,837 | 5.96% |
| 4-2  | 17,449,477 | 13,335,806 | 76.43% | 3,046,574 | 17.46% | 1,067,097 | 6.12% |
| 4-3  | 16,917,670 | 12,931,471 | 76.44% | 2,936,725 | 17.36% | 1,049,474 | 6.20% |
| 4-4  | 18,631,129 | 13,722,316 | 73.65% | 3,735,657 | 20.05% | 1,173,156 | 6.30% |
| 4-5  | 18,661,367 | 13,983,082 | 74.93% | 3,476,516 | 18.63% | 1,201,769 | 6.44% |
| 4-6  | 20,693,949 | 15,771,998 | 76.22% | 3,738,026 | 18.06% | 1,183,925 | 5.72% |
| 4-7  | 28,850,128 | 21,278,408 | 73.75% | 5,766,100 | 19.99% | 1,805,620 | 6.26% |
| 4-8  | 29,279,184 | 21,613,352 | 73.82% | 5,896,947 | 20.14% | 1,768,885 | 6.04% |
| 4-9  | 21,633,852 | 16,031,618 | 74.10% | 4,472,997 | 20.68% | 1,129,237 | 5.22% |
| 4-10 | 22,831,076 | 17,348,417 | 75.99% | 4,187,834 | 18.34% | 1,294,825 | 5.67% |
| 4-11 | 18,059,914 | 13,568,692 | 75.13% | 3,421,926 | 18.95% | 1,069,296 | 5.92% |
| 4-12 | 18,719,603 | 13,876,736 | 74.13% | 3,824,007 | 20.43% | 1,018,860 | 5.44% |
| 4-13 | 20,333,087 | 15,104,618 | 74.29% | 4,004,474 | 19.69% | 1,223,995 | 6.02% |
| 4-14 | 19,349,734 | 13,817,491 | 71.41% | 4,397,528 | 22.73% | 1,134,715 | 5.86% |
| 4-15 | 23,800,925 | 17,814,496 | 74.85% | 4,645,005 | 19.52% | 1,341,424 | 5.64% |
| 4-16 | 17,814,151 | 13,479,272 | 75.67% | 3,286,644 | 18.45% | 1,048,235 | 5.88% |
| 4-17 | 18,568,142 | 14,257,647 | 76.79% | 3,334,959 | 17.96% | 975,536   | 5.25% |
| 4-18 | 18,720,938 | 13,653,500 | 72.93% | 3,983,801 | 21.28% | 1,083,637 | 5.79% |
| 4-19 | 18,185,304 | 13,084,999 | 71.95% | 4,072,284 | 22.39% | 1,028,021 | 5.65% |
| 4-20 | 29,886,891 | 21,923,265 | 73.35% | 6,110,462 | 20.45% | 1,853,164 | 6.20% |
| 4-21 | 22,430,274 | 16,651,378 | 74.24% | 4,491,468 | 20.02% | 1,287,428 | 5.74% |
| 4-22 | 26,013,139 | 19,773,956 | 76.02% | 4,768,855 | 18.33% | 1,470,328 | 5.65% |
| 4-23 | 19,254,244 | 14,746,816 | 76.59% | 3,407,902 | 17.70% | 1,099,526 | 5.71% |
| 4-24 | 18,311,602 | 13,469,235 | 73.56% | 3,794,861 | 20.72% | 1,047,506 | 5.72% |
| 4-25 | 21,037,109 | 15,296,358 | 72.71% | 4,206,078 | 19.99% | 1,534,673 | 7.30% |
| 4-26 | 22,697,094 | 16,191,634 | 71.34% | 4,939,159 | 21.76% | 1,566,301 | 6.90% |

|      |            |            |        |           |        |            |        |
|------|------------|------------|--------|-----------|--------|------------|--------|
| 4-27 | 22,041,601 | 16,190,731 | 73.46% | 4,523,266 | 20.52% | 1,327,604  | 6.02%  |
| 4-28 | 25,318,467 | 19,393,723 | 76.60% | 4,452,140 | 17.58% | 1,472,604  | 5.82%  |
| 4-29 | 22,390,397 | 16,647,011 | 74.35% | 4,203,354 | 18.77% | 1,540,032  | 6.88%  |
| 4-30 | 17,390,090 | 12,911,292 | 74.25% | 3,508,971 | 20.18% | 969,827    | 5.58%  |
| 4-31 | 49,610,804 | 36,279,271 | 73.13% | 9,903,619 | 19.96% | 3,427,914  | 6.91%  |
| 4-32 | 21,768,917 | 2,968,042  | 13.63% | 2,010,658 | 9.24%  | 16,790,217 | 77.13% |
| 4-33 | 36,848,721 | 26,837,083 | 72.83% | 7,195,159 | 19.53% | 2,816,479  | 7.64%  |
| 5-1  | 22,075,389 | 15,941,289 | 72.21% | 4,494,073 | 20.36% | 1,640,027  | 7.43%  |
| 5-2  | 21,188,189 | 14,943,046 | 70.53% | 4,834,889 | 22.82% | 1,410,254  | 6.66%  |
| 5-3  | 21,197,525 | 15,500,739 | 73.13% | 4,289,695 | 20.24% | 1,407,091  | 6.64%  |
| 5-4  | 18,758,919 | 14,212,860 | 75.77% | 3,497,159 | 18.64% | 1,048,900  | 5.59%  |
| 5-5  | 23,382,897 | 16,994,734 | 72.68% | 4,640,126 | 19.84% | 1,748,037  | 7.48%  |
| 5-6  | 20,741,147 | 15,200,694 | 73.29% | 4,032,250 | 19.44% | 1,508,203  | 7.27%  |
| 5-7  | 19,264,315 | 13,913,309 | 72.22% | 4,080,184 | 21.18% | 1,270,822  | 6.60%  |
| 5-8  | 23,715,505 | 17,260,382 | 72.78% | 4,884,130 | 20.59% | 1,570,993  | 6.62%  |
| 5-9  | 19,181,776 | 13,778,940 | 71.83% | 4,063,824 | 21.19% | 1,339,012  | 6.98%  |
| 5-10 | 17,833,383 | 12,775,533 | 71.64% | 3,841,314 | 21.54% | 1,216,536  | 6.82%  |
| 5-11 | 19,058,993 | 13,813,395 | 72.48% | 3,832,772 | 20.11% | 1,412,826  | 7.41%  |
| 5-12 | 33,351,711 | 23,984,812 | 71.91% | 6,677,434 | 20.02% | 2,689,465  | 8.06%  |
| 5-13 | 19,697,581 | 14,502,457 | 73.63% | 3,769,913 | 19.14% | 1,425,211  | 7.24%  |
| 5-14 | 20,898,046 | 14,553,919 | 69.64% | 4,801,252 | 22.97% | 1,542,875  | 7.38%  |
| 5-15 | 24,081,733 | 16,790,889 | 69.72% | 5,199,538 | 21.59% | 2,091,306  | 8.68%  |
| 5-16 | 22,210,598 | 15,789,346 | 71.09% | 4,611,011 | 20.76% | 1,810,241  | 8.15%  |
| 5-17 | 17,630,524 | 12,408,111 | 70.38% | 3,950,205 | 22.41% | 1,272,208  | 7.22%  |
| 5-18 | 17,492,885 | 12,544,672 | 71.71% | 3,683,575 | 21.06% | 1,264,638  | 7.23%  |
| 5-19 | 21,617,545 | 16,066,286 | 74.32% | 4,114,088 | 19.03% | 1,437,171  | 6.65%  |
| 5-20 | 20,763,637 | 15,157,725 | 73.00% | 4,295,567 | 20.69% | 1,310,345  | 6.31%  |
| 5-21 | 20,241,732 | 14,968,546 | 73.95% | 4,104,328 | 20.28% | 1,168,858  | 5.77%  |
| 5-22 | 19,129,928 | 14,025,189 | 73.32% | 3,790,123 | 19.81% | 1,314,616  | 6.87%  |
| 5-23 | 18,426,493 | 13,366,761 | 72.54% | 3,790,942 | 20.57% | 1,268,790  | 6.89%  |
| 6-1  | 22,095,878 | 16,797,524 | 76.02% | 3,830,879 | 17.34% | 1,467,475  | 6.64%  |
| 6-2  | 26,655,681 | 18,985,701 | 71.23% | 5,820,138 | 21.83% | 1,849,842  | 6.94%  |
| 6-3  | 17,445,552 | 12,644,522 | 72.48% | 3,591,730 | 20.59% | 1,209,300  | 6.93%  |
| 6-4  | 21,627,470 | 15,279,499 | 70.65% | 4,779,101 | 22.10% | 1,568,870  | 7.25%  |
| 6-5  | 22,070,266 | 16,178,888 | 73.31% | 4,377,418 | 19.83% | 1,513,960  | 6.86%  |
| 6-6  | 21,750,883 | 15,176,320 | 69.77% | 4,844,650 | 22.27% | 1,729,913  | 7.95%  |
| 6-7  | 19,685,405 | 14,392,532 | 73.11% | 3,876,277 | 19.69% | 1,416,596  | 7.20%  |
| 6-8  | 18,928,584 | 14,062,879 | 74.29% | 3,776,456 | 19.95% | 1,089,249  | 5.75%  |
| 6-9  | 31,815,280 | 23,357,866 | 73.42% | 6,236,743 | 19.60% | 2,220,671  | 6.98%  |
| 6-10 | 21,591,833 | 15,348,423 | 71.08% | 4,483,323 | 20.76% | 1,760,087  | 8.15%  |
| 6-11 | 19,801,404 | 14,187,866 | 71.65% | 4,071,392 | 20.56% | 1,542,146  | 7.79%  |
| 6-12 | 20,344,054 | 14,229,140 | 69.94% | 4,328,834 | 21.28% | 1,786,080  | 8.78%  |
| 6-13 | 20,523,435 | 14,660,641 | 71.43% | 4,133,822 | 20.14% | 1,728,972  | 8.42%  |
| 6-14 | 16,810,602 | 12,141,380 | 72.22% | 3,447,702 | 20.51% | 1,221,520  | 7.27%  |
| 6-15 | 16,729,016 | 12,181,805 | 72.82% | 3,317,210 | 19.83% | 1,230,001  | 7.35%  |
| 6-16 | 27,328,701 | 19,625,922 | 71.81% | 5,432,493 | 19.88% | 2,270,286  | 8.31%  |
| 6-17 | 30,684,850 | 21,967,874 | 71.59% | 6,212,764 | 20.25% | 2,504,212  | 8.16%  |
| 6-18 | 19,996,861 | 14,835,771 | 74.19% | 3,691,687 | 18.46% | 1,469,403  | 7.35%  |

|      |            |            |        |           |        |           |       |
|------|------------|------------|--------|-----------|--------|-----------|-------|
| 6-19 | 23,496,491 | 16,728,384 | 71.20% | 4,730,817 | 20.13% | 2,037,290 | 8.67% |
| 6-20 | 20,609,094 | 15,248,121 | 73.99% | 4,136,719 | 20.07% | 1,224,254 | 5.94% |
| 6-21 | 34,000,960 | 23,797,918 | 69.99% | 6,927,437 | 20.37% | 3,275,605 | 9.63% |
| 6-22 | 16,961,576 | 12,649,845 | 74.58% | 3,188,576 | 18.80% | 1,123,155 | 6.62% |
| 6-23 | 16,768,854 | 12,132,840 | 72.35% | 3,430,051 | 20.45% | 1,205,963 | 7.19% |
| 6-24 | 17,680,793 | 12,872,189 | 72.80% | 3,602,241 | 20.37% | 1,206,363 | 6.82% |
| 6-25 | 17,593,859 | 12,680,791 | 72.08% | 3,629,575 | 20.63% | 1,283,493 | 7.30% |
| 6-26 | 25,699,388 | 18,512,980 | 72.04% | 5,161,402 | 20.08% | 2,025,006 | 7.88% |
| 6-27 | 21,630,305 | 16,182,947 | 74.82% | 3,907,225 | 18.06% | 1,540,133 | 7.12% |
| 7-1  | 19,244,283 | 13,677,271 | 71.07% | 4,171,614 | 21.68% | 1,395,398 | 7.25% |
| 7-2  | 20,098,325 | 14,997,489 | 74.62% | 3,715,639 | 18.49% | 1,385,197 | 6.89% |
| 7-3  | 28,054,099 | 21,005,265 | 74.87% | 5,265,969 | 18.77% | 1,782,865 | 6.36% |
| 7-4  | 18,612,909 | 13,134,336 | 70.57% | 4,094,779 | 22.00% | 1,383,794 | 7.43% |
| 7-5  | 18,962,818 | 14,829,913 | 78.21% | 2,948,994 | 15.55% | 1,183,911 | 6.24% |
| 7-6  | 16,971,248 | 12,274,447 | 72.32% | 3,594,885 | 21.18% | 1,101,916 | 6.49% |
| 7-7  | 19,752,858 | 13,571,473 | 68.71% | 4,509,474 | 22.83% | 1,671,911 | 8.46% |
| 7-8  | 20,071,204 | 14,204,734 | 70.77% | 4,148,803 | 20.67% | 1,717,667 | 8.56% |
| 7-9  | 19,442,153 | 14,251,467 | 73.30% | 3,762,418 | 19.35% | 1,428,268 | 7.35% |
| 7-10 | 20,215,024 | 13,898,572 | 68.75% | 4,571,420 | 22.61% | 1,745,032 | 8.63% |
| 7-11 | 14,832,191 | 10,702,424 | 72.16% | 3,007,649 | 20.28% | 1,122,118 | 7.57% |
| 7-12 | 17,318,660 | 12,747,495 | 73.61% | 3,620,688 | 20.91% | 950,477   | 5.49% |
| 7-13 | 19,931,234 | 15,134,573 | 75.93% | 3,536,192 | 17.74% | 1,260,469 | 6.32% |
| 7-14 | 20,066,281 | 14,561,430 | 72.57% | 4,107,664 | 20.47% | 1,397,187 | 6.96% |
| 7-15 | 20,253,388 | 14,355,412 | 70.88% | 4,315,535 | 21.31% | 1,582,441 | 7.81% |
| 8-1  | 18,217,752 | 13,080,403 | 71.80% | 3,757,532 | 20.63% | 1,379,817 | 7.57% |
| 8-2  | 16,860,275 | 12,201,609 | 72.37% | 3,291,832 | 19.52% | 1,366,834 | 8.11% |
| 8-3  | 20,622,751 | 14,714,107 | 71.35% | 4,193,757 | 20.34% | 1,714,887 | 8.32% |
| 8-4  | 17,370,312 | 12,920,994 | 74.39% | 3,130,608 | 18.02% | 1,318,710 | 7.59% |
| 8-5  | 18,455,512 | 13,159,119 | 71.30% | 3,839,530 | 20.80% | 1,456,863 | 7.89% |
| 8-6  | 17,485,669 | 12,674,448 | 72.48% | 3,571,595 | 20.43% | 1,239,626 | 7.09% |
| 8-7  | 17,957,071 | 13,020,687 | 72.51% | 3,731,582 | 20.78% | 1,204,802 | 6.71% |
| 8-8  | 19,429,902 | 14,102,705 | 72.58% | 3,720,905 | 19.15% | 1,606,292 | 8.27% |
| 8-9  | 18,270,163 | 12,882,559 | 70.51% | 3,914,517 | 21.43% | 1,473,087 | 8.06% |
| 8-10 | 19,754,211 | 14,229,457 | 72.03% | 3,818,231 | 19.33% | 1,706,523 | 8.64% |
| 8-11 | 19,098,637 | 14,209,745 | 74.40% | 3,549,259 | 18.58% | 1,339,633 | 7.01% |
| 8-12 | 19,871,730 | 14,649,165 | 73.72% | 3,672,971 | 18.48% | 1,549,594 | 7.80% |
| 8-13 | 16,789,864 | 12,193,716 | 72.63% | 3,207,294 | 19.10% | 1,388,854 | 8.27% |
| 8-14 | 17,909,878 | 13,469,418 | 75.21% | 3,274,121 | 18.28% | 1,166,339 | 6.51% |
| 8-15 | 18,905,360 | 13,239,207 | 70.03% | 4,167,899 | 22.05% | 1,498,254 | 7.93% |
| 8-16 | 18,981,062 | 14,139,818 | 74.49% | 3,522,731 | 18.56% | 1,318,513 | 6.95% |
| 8-17 | 18,523,638 | 13,360,920 | 72.13% | 3,862,142 | 20.85% | 1,300,576 | 7.02% |
| 8-18 | 20,244,350 | 14,894,834 | 73.58% | 3,813,222 | 18.84% | 1,536,294 | 7.59% |
| 8-19 | 18,582,861 | 13,884,740 | 74.72% | 3,688,454 | 19.85% | 1,009,667 | 5.43% |
| 8-20 | 20,901,816 | 15,247,251 | 72.95% | 4,106,476 | 19.65% | 1,548,089 | 7.41% |
| 8-21 | 19,099,673 | 13,681,885 | 71.63% | 4,060,425 | 21.26% | 1,357,363 | 7.11% |
| 8-22 | 23,462,870 | 17,276,537 | 73.63% | 4,637,027 | 19.76% | 1,549,306 | 6.60% |
| 8-23 | 19,915,380 | 14,731,761 | 73.97% | 3,859,892 | 19.38% | 1,323,727 | 6.65% |
| 8-24 | 20,305,028 | 15,151,914 | 74.62% | 3,725,589 | 18.35% | 1,427,525 | 7.03% |

|      |            |            |        |            |        |           |       |
|------|------------|------------|--------|------------|--------|-----------|-------|
| 9-1  | 18,936,685 | 14,109,741 | 74.51% | 3,582,555  | 18.92% | 1,244,389 | 6.57% |
| 9-2  | 17,299,580 | 12,813,596 | 74.07% | 3,360,447  | 19.43% | 1,125,537 | 6.51% |
| 9-3  | 17,897,609 | 12,940,422 | 72.30% | 3,707,302  | 20.71% | 1,249,885 | 6.98% |
| 9-4  | 18,222,372 | 13,431,660 | 73.71% | 3,659,999  | 20.09% | 1,130,713 | 6.21% |
| 9-5  | 18,277,396 | 13,667,784 | 74.78% | 3,315,024  | 18.14% | 1,294,588 | 7.08% |
| 9-6  | 18,796,613 | 13,706,299 | 72.92% | 3,737,759  | 19.89% | 1,352,555 | 7.20% |
| 9-7  | 18,668,951 | 13,633,793 | 73.03% | 3,706,475  | 19.85% | 1,328,683 | 7.12% |
| 9-8  | 18,422,774 | 13,552,097 | 73.56% | 3,572,113  | 19.39% | 1,298,564 | 7.05% |
| 9-9  | 23,386,090 | 16,872,175 | 72.15% | 4,804,178  | 20.54% | 1,709,737 | 7.31% |
| 9-10 | 20,023,061 | 14,959,170 | 74.71% | 3,593,634  | 17.95% | 1,470,257 | 7.34% |
| 9-11 | 36,969,892 | 27,111,460 | 73.33% | 7,240,775  | 19.59% | 2,617,657 | 7.08% |
| 9-12 | 84,261,886 | 61,488,287 | 72.97% | 16,540,105 | 19.63% | 6,233,494 | 7.40% |
| 9-13 | 19,038,112 | 13,627,225 | 71.58% | 4,002,566  | 21.02% | 1,408,321 | 7.40% |
| 9-14 | 32,403,094 | 23,460,415 | 72.40% | 6,629,665  | 20.46% | 2,313,014 | 7.14% |
| 9-15 | 33,611,912 | 24,815,084 | 73.83% | 6,821,469  | 20.29% | 1,975,359 | 5.88% |
| 9-16 | 59,602,762 | 44,562,182 | 74.77% | 11,727,003 | 19.68% | 3,313,577 | 5.56% |
| 9-17 | 65,149,516 | 48,339,945 | 74.20% | 13,211,652 | 20.28% | 3,597,919 | 5.52% |
| 9-18 | 32,384,240 | 23,746,550 | 73.33% | 6,857,816  | 21.18% | 1,779,874 | 5.50% |
| 9-19 | 24,699,758 | 18,891,533 | 76.48% | 4,557,388  | 18.45% | 1,250,837 | 5.06% |

**Table S3:** Information of Sequence Data.

| Sample | Raw Reads  | Discarded Reads(%) | Clean Reads | Clean Bases    | GC(%) | Q20(%) | Q30(%) | Coverage(%) | Mean Depth |
|--------|------------|--------------------|-------------|----------------|-------|--------|--------|-------------|------------|
| 1-1    | 21,053,091 | 5.39%              | 19,918,039  | 5,850,656,098  | 43.89 | 98.32  | 94.98  | 86.81       | 13.66      |
| 1-2    | 18,693,667 | 7.17%              | 17,352,739  | 5,075,691,600  | 43.58 | 98.00  | 94.11  | 86.96       | 11.59      |
| 1-3    | 27,434,768 | 6.15%              | 25,748,498  | 7,515,339,185  | 44.00 | 98.20  | 94.65  | 88.84       | 9.25       |
| 1-4    | 19,892,644 | 5.69%              | 18,760,209  | 5,507,804,466  | 43.91 | 98.21  | 94.64  | 88.11       | 12.43      |
| 1-5    | 20,988,010 | 6.21%              | 19,683,965  | 5,775,944,776  | 43.81 | 98.18  | 94.62  | 87.76       | 13.05      |
| 1-6    | 31,035,943 | 4.18%              | 29,738,970  | 8,743,467,272  | 43.37 | 98.42  | 95.21  | 89.50       | 10.58      |
| 1-7    | 17,630,766 | 5.33%              | 16,691,695  | 4,909,662,490  | 43.73 | 98.29  | 94.87  | 86.44       | 11.13      |
| 1-8    | 21,395,909 | 5.63%              | 20,191,159  | 5,936,014,576  | 43.72 | 98.23  | 94.69  | 87.46       | 13.14      |
| 1-9    | 20,678,014 | 5.31%              | 19,580,411  | 5,745,190,704  | 43.81 | 98.41  | 95.24  | 87.49       | 12.87      |
| 1-10   | 26,225,119 | 6.07%              | 24,632,793  | 7,233,666,740  | 44.24 | 98.19  | 94.59  | 88.62       | 8.85       |
| 1-11   | 18,987,955 | 5.08%              | 18,023,537  | 5,209,548,524  | 44.14 | 98.47  | 95.33  | 86.43       | 11.79      |
| 1-12   | 21,232,057 | 5.48%              | 20,069,433  | 5,866,891,109  | 43.85 | 98.37  | 95.13  | 87.53       | 13.20      |
| 1-13   | 21,232,828 | 6.84%              | 19,781,098  | 5,757,611,127  | 43.69 | 98.04  | 94.22  | 87.90       | 13.00      |
| 1-14   | 20,996,328 | 6.42%              | 19,649,095  | 5,767,442,522  | 43.49 | 98.14  | 94.57  | 87.43       | 13.39      |
| 1-15   | 17,841,889 | 5.68%              | 16,828,397  | 4,903,820,128  | 43.63 | 98.37  | 95.09  | 85.47       | 11.34      |
| 1-16   | 17,843,588 | 4.62%              | 17,019,781  | 4,991,120,151  | 43.62 | 98.32  | 94.93  | 86.52       | 11.79      |
| 1-17   | 18,983,085 | 6.29%              | 17,788,968  | 5,224,091,173  | 43.72 | 98.18  | 94.57  | 87.89       | 11.91      |
| 1-18   | 21,284,184 | 5.27%              | 20,162,956  | 5,935,678,741  | 43.62 | 98.30  | 94.93  | 88.50       | 13.41      |
| 1-19   | 44,222,768 | 5.49%              | 41,795,091  | 12,251,512,872 | 43.85 | 98.27  | 94.80  | 89.57       | 15.27      |
| 1-20   | 41,090,021 | 5.50%              | 38,828,166  | 11,418,618,986 | 44.34 | 98.17  | 94.50  | 89.37       | 14.25      |
| 2-1    | 21,948,422 | 5.88%              | 20,658,114  | 6,066,169,124  | 43.60 | 98.32  | 94.97  | 87.15       | 13.30      |
| 2-2    | 22,030,156 | 5.32%              | 20,858,829  | 6,121,399,098  | 43.70 | 98.45  | 95.36  | 87.83       | 7.91       |
| 2-3    | 19,073,846 | 6.33%              | 17,867,017  | 5,209,301,558  | 43.65 | 98.24  | 94.73  | 87.69       | 11.08      |
| 2-4    | 41,940,867 | 7.36%              | 38,853,074  | 11,361,187,015 | 43.78 | 98.02  | 94.13  | 89.88       | 15.77      |
| 2-5    | 20,772,581 | 6.17%              | 19,490,339  | 5,690,884,576  | 43.84 | 98.31  | 94.91  | 86.90       | 12.64      |

|      |            |       |            |                |       |       |       |       |       |
|------|------------|-------|------------|----------------|-------|-------|-------|-------|-------|
| 2-6  | 21,302,842 | 5.43% | 20,145,591 | 5,892,696,862  | 43.83 | 98.41 | 95.25 | 87.87 | 13.45 |
| 2-7  | 18,339,752 | 6.54% | 17,139,641 | 5,005,731,472  | 43.68 | 98.23 | 94.70 | 87.74 | 11.12 |
| 2-8  | 22,254,955 | 5.83% | 20,957,692 | 6,104,937,103  | 44.14 | 98.38 | 95.17 | 87.77 | 7.86  |
| 2-9  | 28,312,739 | 6.12% | 26,579,563 | 7,785,284,744  | 43.74 | 98.29 | 94.86 | 88.39 | 10.38 |
| 2-10 | 21,660,667 | 6.15% | 20,329,219 | 5,931,403,118  | 43.68 | 98.23 | 94.70 | 88.18 | 13.65 |
| 2-11 | 34,578,674 | 7.88% | 31,854,805 | 9,238,697,265  | 43.64 | 97.83 | 93.62 | 89.87 | 12.71 |
| 2-12 | 22,368,978 | 6.83% | 20,842,035 | 6,072,935,003  | 43.82 | 98.13 | 94.41 | 88.56 | 13.57 |
| 2-13 | 20,630,499 | 4.92% | 19,615,671 | 5,777,334,191  | 44.14 | 98.39 | 95.15 | 88.33 | 13.33 |
| 2-14 | 25,426,788 | 6.99% | 23,649,978 | 6,877,200,677  | 43.67 | 98.15 | 94.52 | 88.42 | 8.77  |
| 2-15 | 24,580,158 | 6.48% | 22,986,718 | 6,670,475,892  | 43.75 | 98.25 | 94.76 | 88.45 | 9.25  |
| 2-16 | 22,165,916 | 6.68% | 20,685,008 | 5,984,766,174  | 43.55 | 98.34 | 95.08 | 87.67 | 13.54 |
| 2-17 | 38,084,045 | 6.65% | 35,549,815 | 10,357,182,467 | 43.48 | 98.13 | 94.45 | 90.33 | 13.95 |
| 2-18 | 21,708,022 | 7.06% | 20,176,135 | 5,856,054,324  | 43.59 | 98.19 | 94.61 | 87.86 | 13.21 |
| 2-19 | 19,956,215 | 5.23% | 18,912,517 | 5,525,074,663  | 43.87 | 98.49 | 95.48 | 87.51 | 12.57 |
| 2-20 | 19,640,371 | 5.63% | 18,534,338 | 5,407,252,832  | 44.12 | 98.37 | 95.07 | 86.22 | 12.37 |
| 2-21 | 21,672,176 | 6.38% | 20,290,205 | 5,890,491,938  | 43.68 | 98.19 | 94.63 | 88.16 | 12.92 |
| 2-22 | 19,680,958 | 5.76% | 18,546,597 | 5,378,859,089  | 44.18 | 98.37 | 95.17 | 86.78 | 12.12 |
| 2-23 | 33,167,825 | 6.87% | 30,890,557 | 8,981,780,718  | 44.02 | 98.07 | 94.31 | 90.37 | 11.91 |
| 2-24 | 20,800,548 | 5.90% | 19,574,172 | 5,708,146,804  | 43.77 | 98.25 | 94.78 | 87.36 | 12.82 |
| 2-25 | 23,350,496 | 6.12% | 21,921,263 | 6,399,249,003  | 43.70 | 98.25 | 94.81 | 88.57 | 8.10  |
| 2-26 | 20,973,831 | 6.74% | 19,559,275 | 5,690,955,897  | 43.78 | 98.21 | 94.73 | 86.89 | 12.83 |
| 2-27 | 20,479,456 | 6.28% | 19,193,474 | 5,573,147,232  | 44.25 | 98.34 | 95.09 | 86.64 | 12.39 |
| 2-28 | 17,764,028 | 5.57% | 16,775,444 | 4,900,686,756  | 44.00 | 98.21 | 94.65 | 86.63 | 11.50 |
| 2-29 | 19,320,621 | 6.15% | 18,131,639 | 5,302,491,395  | 43.66 | 98.27 | 94.90 | 87.21 | 12.33 |
| 3-1  | 28,037,556 | 5.24% | 26,569,653 | 7,793,387,651  | 43.69 | 98.20 | 94.62 | 88.70 | 10.95 |
| 3-2  | 29,149,065 | 5.13% | 27,653,479 | 8,138,617,962  | 44.06 | 98.18 | 94.55 | 89.49 | 10.96 |
| 3-3  | 19,118,664 | 7.01% | 17,777,653 | 5,200,841,581  | 43.60 | 98.04 | 94.24 | 86.77 | 12.17 |
| 3-4  | 24,872,697 | 5.25% | 23,567,978 | 6,904,413,009  | 43.04 | 98.30 | 94.92 | 87.44 | 9.47  |
| 3-5  | 23,634,424 | 5.96% | 22,225,138 | 6,479,817,982  | 43.65 | 98.16 | 94.53 | 89.21 | 8.66  |
| 3-6  | 28,616,093 | 6.39% | 26,788,563 | 7,828,721,222  | 43.48 | 98.15 | 94.53 | 88.19 | 10.51 |
| 3-7  | 32,094,035 | 5.92% | 30,194,924 | 8,806,402,475  | 43.68 | 98.17 | 94.55 | 89.03 | 12.10 |
| 3-8  | 27,188,061 | 5.91% | 25,581,752 | 7,502,820,060  | 43.55 | 98.19 | 94.62 | 87.99 | 10.48 |
| 3-9  | 18,660,983 | 6.84% | 17,383,683 | 5,043,357,386  | 44.11 | 98.02 | 94.14 | 86.52 | 11.62 |
| 3-10 | 20,330,333 | 8.21% | 18,661,111 | 5,451,554,688  | 43.43 | 97.87 | 93.91 | 88.18 | 12.49 |
| 3-11 | 17,576,573 | 6.07% | 16,509,489 | 4,800,815,351  | 43.36 | 98.17 | 94.59 | 86.02 | 10.88 |
| 3-12 | 26,051,662 | 6.48% | 24,363,083 | 7,109,929,833  | 43.66 | 98.18 | 94.64 | 88.16 | 8.92  |
| 3-13 | 28,923,986 | 6.47% | 27,052,418 | 7,886,909,217  | 43.87 | 98.19 | 94.66 | 88.84 | 10.60 |
| 3-14 | 22,685,482 | 6.41% | 21,232,044 | 6,214,219,655  | 43.48 | 98.18 | 94.62 | 87.87 | 8.07  |
| 3-15 | 21,720,236 | 5.58% | 20,508,523 | 6,020,861,146  | 43.43 | 98.27 | 94.86 | 87.25 | 13.84 |
| 3-16 | 23,460,639 | 6.70% | 21,887,888 | 6,400,309,228  | 43.24 | 98.11 | 94.46 | 87.28 | 8.54  |
| 3-17 | 23,524,886 | 6.60% | 21,971,757 | 6,399,009,228  | 43.30 | 98.15 | 94.55 | 87.49 | 8.34  |
| 3-18 | 29,114,283 | 5.68% | 27,460,854 | 7,987,902,319  | 43.24 | 98.31 | 94.97 | 87.93 | 9.86  |
| 3-19 | 22,708,066 | 6.54% | 21,223,465 | 6,184,855,267  | 43.37 | 98.19 | 94.66 | 87.49 | 8.15  |
| 3-20 | 20,169,402 | 6.09% | 18,941,997 | 5,519,859,564  | 43.46 | 98.29 | 94.95 | 86.64 | 12.37 |
| 3-21 | 20,742,156 | 6.85% | 19,320,338 | 5,646,680,397  | 43.16 | 97.99 | 94.14 | 87.63 | 12.94 |
| 3-22 | 20,066,264 | 6.53% | 18,755,373 | 5,472,911,738  | 43.36 | 98.24 | 94.82 | 86.97 | 12.16 |
| 3-23 | 18,072,331 | 6.30% | 16,934,443 | 4,951,565,112  | 43.11 | 98.17 | 94.60 | 86.09 | 11.32 |
| 3-24 | 21,433,453 | 5.14% | 20,332,314 | 5,924,323,398  | 43.30 | 98.43 | 95.27 | 87.10 | 13.60 |

|      |            |        |            |                |       |       |       |       |       |
|------|------------|--------|------------|----------------|-------|-------|-------|-------|-------|
| 3-25 | 18,058,194 | 6.32%  | 16,917,656 | 4,934,167,000  | 43.80 | 98.32 | 95.05 | 86.14 | 11.18 |
| 3-26 | 21,999,108 | 7.42%  | 20,366,320 | 5,949,770,482  | 43.46 | 97.77 | 93.52 | 87.13 | 13.45 |
| 3-27 | 19,634,238 | 6.03%  | 18,450,803 | 5,399,898,903  | 43.59 | 98.33 | 95.08 | 86.70 | 12.35 |
| 3-28 | 27,192,312 | 6.26%  | 25,489,054 | 7,462,980,674  | 43.46 | 98.24 | 94.79 | 89.09 | 9.48  |
| 3-29 | 20,297,682 | 6.02%  | 19,075,079 | 5,585,657,039  | 43.47 | 98.30 | 94.94 | 87.45 | 12.75 |
| 3-30 | 24,977,059 | 5.98%  | 23,482,798 | 6,876,355,484  | 43.33 | 98.18 | 94.62 | 87.47 | 9.21  |
| 4-1  | 20,409,958 | 5.88%  | 19,209,356 | 5,613,340,983  | 43.94 | 98.31 | 94.97 | 87.33 | 12.87 |
| 4-2  | 18,820,220 | 7.28%  | 17,449,477 | 5,093,088,556  | 43.75 | 98.12 | 94.51 | 87.33 | 11.80 |
| 4-3  | 18,075,035 | 6.40%  | 16,917,670 | 4,945,507,313  | 44.08 | 98.28 | 94.93 | 87.00 | 11.49 |
| 4-4  | 19,957,802 | 6.65%  | 18,631,129 | 5,455,433,261  | 43.72 | 98.24 | 94.82 | 87.92 | 12.09 |
| 4-5  | 20,610,250 | 9.46%  | 18,661,367 | 5,416,297,982  | 43.52 | 97.84 | 93.71 | 88.53 | 12.15 |
| 4-6  | 22,347,008 | 7.40%  | 20,693,949 | 6,023,154,350  | 43.75 | 98.03 | 94.17 | 89.94 | 13.49 |
| 4-7  | 31,232,439 | 7.63%  | 28,850,128 | 8,339,708,258  | 43.69 | 98.19 | 94.62 | 88.55 | 11.90 |
| 4-8  | 31,741,684 | 7.76%  | 29,279,184 | 8,510,946,707  | 43.46 | 98.05 | 94.23 | 90.30 | 11.70 |
| 4-9  | 23,682,398 | 8.65%  | 21,633,852 | 6,322,928,509  | 44.66 | 97.87 | 93.85 | 87.78 | 8.44  |
| 4-10 | 24,744,425 | 7.73%  | 22,831,076 | 6,621,961,081  | 43.68 | 97.97 | 94.01 | 89.89 | 9.66  |
| 4-11 | 19,588,730 | 7.80%  | 18,059,914 | 5,223,423,667  | 43.49 | 98.15 | 94.52 | 87.51 | 11.90 |
| 4-12 | 21,433,359 | 12.66% | 18,719,603 | 5,417,644,979  | 43.28 | 97.47 | 92.87 | 86.95 | 12.25 |
| 4-13 | 22,167,071 | 8.27%  | 20,333,087 | 5,923,966,825  | 43.59 | 97.97 | 94.04 | 87.77 | 13.27 |
| 4-14 | 20,937,968 | 7.59%  | 19,349,734 | 5,607,437,645  | 43.37 | 98.15 | 94.53 | 87.00 | 12.20 |
| 4-15 | 25,516,143 | 6.72%  | 23,800,925 | 6,950,735,929  | 43.06 | 98.14 | 94.46 | 88.46 | 9.88  |
| 4-16 | 19,368,877 | 8.03%  | 17,814,151 | 5,230,509,538  | 44.57 | 98.12 | 94.55 | 87.59 | 11.93 |
| 4-17 | 19,647,671 | 5.49%  | 18,568,142 | 5,416,433,733  | 43.23 | 98.26 | 94.81 | 87.93 | 12.52 |
| 4-18 | 20,167,671 | 7.17%  | 18,720,938 | 5,470,806,084  | 43.43 | 98.18 | 94.67 | 87.68 | 12.04 |
| 4-19 | 19,537,417 | 6.92%  | 18,185,304 | 5,337,170,881  | 44.36 | 98.30 | 95.03 | 86.39 | 11.76 |
| 4-20 | 32,548,096 | 8.18%  | 29,886,891 | 8,708,759,488  | 43.84 | 98.01 | 94.14 | 88.12 | 12.01 |
| 4-21 | 24,073,136 | 6.82%  | 22,430,274 | 6,494,618,211  | 43.83 | 98.22 | 94.68 | 87.22 | 9.35  |
| 4-22 | 27,929,789 | 6.86%  | 26,013,139 | 7,610,577,548  | 43.43 | 98.08 | 94.30 | 88.21 | 10.84 |
| 4-23 | 20,519,817 | 6.17%  | 19,254,244 | 5,615,088,620  | 43.83 | 98.31 | 95.00 | 86.32 | 13.18 |
| 4-24 | 19,532,401 | 6.25%  | 18,311,602 | 5,329,669,082  | 43.80 | 98.26 | 94.78 | 86.23 | 12.04 |
| 4-25 | 22,289,765 | 5.62%  | 21,037,109 | 6,155,690,796  | 43.93 | 98.23 | 94.63 | 87.43 | 9.58  |
| 4-26 | 24,094,963 | 5.80%  | 22,697,094 | 6,606,485,237  | 43.74 | 98.15 | 94.42 | 87.77 | 10.16 |
| 4-27 | 23,717,573 | 7.07%  | 22,041,601 | 6,395,208,131  | 44.12 | 97.68 | 93.15 | 88.77 | 10.72 |
| 4-28 | 26,570,902 | 4.71%  | 25,318,467 | 7,432,512,778  | 43.52 | 98.28 | 94.74 | 90.16 | 11.92 |
| 4-29 | 23,583,776 | 5.06%  | 22,390,397 | 6,493,518,841  | 43.70 | 98.30 | 94.72 | 89.11 | 10.56 |
| 4-30 | 18,738,150 | 7.19%  | 17,390,090 | 5,107,092,670  | 44.22 | 98.15 | 94.60 | 86.12 | 11.64 |
| 4-31 | 51,751,457 | 4.14%  | 49,610,804 | 14,439,725,731 | 44.07 | 98.07 | 93.72 | 91.16 | 26.43 |
| 4-32 | 22,653,567 | 3.91%  | 21,768,917 | 6,388,987,695  | 45.04 | 98.45 | 95.11 | 8.95  | 2.43  |
| 4-33 | 38,592,343 | 4.52%  | 36,848,721 | 10,690,167,117 | 44.24 | 97.88 | 93.24 | 89.44 | 19.97 |
| 5-1  | 23,043,613 | 4.20%  | 22,075,389 | 6,431,758,099  | 44.50 | 98.04 | 93.69 | 88.68 | 12.08 |
| 5-2  | 22,602,035 | 6.26%  | 21,188,189 | 6,158,719,473  | 43.92 | 98.07 | 94.25 | 87.81 | 9.37  |
| 5-3  | 22,357,867 | 5.19%  | 21,197,525 | 6,188,319,626  | 43.82 | 98.28 | 94.76 | 87.92 | 9.65  |
| 5-4  | 20,043,026 | 6.41%  | 18,758,919 | 5,528,027,225  | 44.14 | 98.27 | 94.84 | 86.08 | 12.82 |
| 5-5  | 24,366,414 | 4.04%  | 23,382,897 | 6,817,003,150  | 44.25 | 98.08 | 93.77 | 89.07 | 12.77 |
| 5-6  | 22,009,225 | 5.76%  | 20,741,147 | 6,020,696,731  | 43.69 | 98.25 | 94.75 | 88.76 | 13.16 |
| 5-7  | 20,550,171 | 6.26%  | 19,264,315 | 5,593,774,050  | 43.41 | 98.20 | 94.63 | 87.48 | 12.23 |
| 5-8  | 25,458,943 | 6.85%  | 23,715,505 | 6,888,259,266  | 43.97 | 96.55 | 90.02 | 87.99 | 13.36 |
| 5-9  | 20,458,766 | 6.24%  | 19,181,776 | 5,607,809,079  | 43.56 | 98.24 | 94.78 | 87.03 | 12.25 |

|      |            |       |            |               |       |       |       |       |       |
|------|------------|-------|------------|---------------|-------|-------|-------|-------|-------|
| 5-10 | 18,989,989 | 6.09% | 17,833,383 | 5,176,888,694 | 43.77 | 98.22 | 94.71 | 86.96 | 11.29 |
| 5-11 | 20,539,428 | 7.21% | 19,058,993 | 5,540,187,276 | 43.62 | 98.11 | 94.46 | 87.09 | 12.21 |
| 5-12 | 34,857,058 | 4.32% | 33,351,711 | 9,682,922,748 | 43.86 | 97.95 | 93.39 | 90.39 | 17.43 |
| 5-13 | 20,470,098 | 3.77% | 19,697,581 | 5,753,466,799 | 44.11 | 98.04 | 93.63 | 88.40 | 12.68 |
| 5-14 | 22,241,548 | 6.04% | 20,898,046 | 6,094,080,473 | 43.92 | 98.20 | 94.59 | 87.49 | 12.81 |
| 5-15 | 25,123,153 | 4.15% | 24,081,733 | 6,997,520,512 | 44.14 | 98.09 | 93.85 | 88.40 | 12.78 |
| 5-16 | 23,543,504 | 5.66% | 22,210,598 | 6,436,354,630 | 43.92 | 98.26 | 94.73 | 86.72 | 10.08 |
| 5-17 | 18,582,239 | 5.12% | 17,630,524 | 5,142,215,791 | 43.70 | 97.92 | 93.37 | 87.72 | 10.93 |
| 5-18 | 18,719,785 | 6.55% | 17,492,885 | 5,075,876,075 | 43.73 | 98.16 | 94.59 | 86.89 | 11.08 |
| 5-19 | 22,712,436 | 4.82% | 21,617,545 | 6,279,174,733 | 43.66 | 98.39 | 95.05 | 88.06 | 10.08 |
| 5-20 | 21,781,328 | 4.67% | 20,763,637 | 6,029,921,548 | 43.59 | 98.39 | 95.08 | 87.78 | 13.25 |
| 5-21 | 21,788,574 | 7.10% | 20,241,732 | 5,875,991,825 | 44.04 | 97.07 | 91.79 | 87.65 | 13.03 |
| 5-22 | 20,444,206 | 6.43% | 19,129,928 | 5,538,182,736 | 43.88 | 98.15 | 94.52 | 88.33 | 12.16 |
| 5-23 | 19,626,530 | 6.11% | 18,426,493 | 5,369,484,292 | 43.56 | 98.27 | 94.85 | 87.37 | 11.80 |
| 6-1  | 22,853,301 | 3.31% | 22,095,878 | 6,455,507,634 | 44.07 | 97.45 | 91.90 | 89.15 | 12.62 |
| 6-2  | 27,927,602 | 4.55% | 26,655,681 | 7,762,913,489 | 43.89 | 97.29 | 91.61 | 89.37 | 14.21 |
| 6-3  | 18,246,919 | 4.39% | 17,445,552 | 5,085,273,208 | 43.91 | 97.90 | 93.28 | 88.46 | 11.04 |
| 6-4  | 23,020,870 | 6.05% | 21,627,470 | 6,294,026,601 | 43.93 | 97.83 | 93.41 | 87.60 | 10.57 |
| 6-5  | 23,514,075 | 6.14% | 22,070,266 | 6,421,800,206 | 44.01 | 98.07 | 94.18 | 88.27 | 10.24 |
| 6-6  | 22,795,879 | 4.58% | 21,750,883 | 6,336,667,199 | 43.56 | 98.01 | 93.58 | 88.83 | 11.20 |
| 6-7  | 20,737,311 | 5.07% | 19,685,405 | 5,706,164,176 | 43.76 | 98.08 | 94.05 | 88.90 | 12.42 |
| 6-8  | 20,018,095 | 5.44% | 18,928,584 | 5,477,209,081 | 43.95 | 94.88 | 85.80 | 90.07 | 11.95 |
| 6-9  | 32,674,207 | 2.63% | 31,815,280 | 9,317,183,513 | 44.84 | 98.14 | 93.76 | 89.89 | 17.33 |
| 6-10 | 22,528,190 | 4.16% | 21,591,833 | 6,251,512,043 | 43.91 | 97.91 | 93.26 | 88.13 | 11.68 |
| 6-11 | 20,888,685 | 5.21% | 19,801,404 | 5,791,750,599 | 43.67 | 98.18 | 94.30 | 87.54 | 12.54 |
| 6-12 | 21,814,993 | 6.74% | 20,344,054 | 5,870,977,097 | 43.94 | 97.93 | 93.74 | 87.07 | 12.48 |
| 6-13 | 21,757,617 | 5.67% | 20,523,435 | 5,938,942,682 | 43.97 | 97.91 | 93.42 | 88.90 | 12.63 |
| 6-14 | 17,812,753 | 5.63% | 16,810,602 | 4,894,769,338 | 43.68 | 98.13 | 94.32 | 86.29 | 10.85 |
| 6-15 | 17,800,734 | 6.02% | 16,729,016 | 4,873,472,909 | 43.57 | 98.10 | 94.25 | 86.31 | 10.88 |
| 6-16 | 28,513,650 | 4.16% | 27,328,701 | 7,985,341,240 | 44.01 | 98.12 | 93.90 | 89.58 | 14.46 |
| 6-17 | 32,009,428 | 4.14% | 30,684,850 | 8,964,513,061 | 43.88 | 97.74 | 92.81 | 90.26 | 16.29 |
| 6-18 | 20,995,551 | 4.76% | 19,996,861 | 5,831,787,400 | 43.30 | 98.09 | 94.06 | 88.67 | 12.91 |
| 6-19 | 24,553,565 | 4.31% | 23,496,491 | 6,804,097,986 | 43.79 | 97.68 | 92.63 | 89.00 | 12.55 |
| 6-20 | 22,113,218 | 6.80% | 20,609,094 | 6,063,225,909 | 44.44 | 98.29 | 94.90 | 86.74 | 13.67 |
| 6-21 | 35,945,747 | 5.41% | 34,000,960 | 9,883,384,013 | 43.48 | 97.93 | 93.50 | 89.35 | 17.44 |
| 6-22 | 17,945,615 | 5.48% | 16,961,576 | 4,948,896,360 | 43.78 | 98.25 | 94.66 | 88.71 | 11.01 |
| 6-23 | 18,145,228 | 7.59% | 16,768,854 | 4,868,649,896 | 43.53 | 98.00 | 94.06 | 86.95 | 10.74 |
| 6-24 | 19,153,841 | 7.69% | 17,680,793 | 5,110,672,117 | 43.40 | 98.01 | 94.04 | 86.95 | 11.34 |
| 6-25 | 18,807,586 | 6.45% | 17,593,859 | 5,123,492,118 | 43.39 | 98.00 | 93.99 | 87.76 | 11.14 |
| 6-26 | 26,928,470 | 4.56% | 25,699,388 | 7,482,921,733 | 44.16 | 98.02 | 93.69 | 88.51 | 14.05 |
| 6-27 | 22,348,802 | 3.21% | 21,630,305 | 6,316,506,503 | 43.97 | 98.26 | 94.16 | 88.25 | 12.33 |
| 7-1  | 20,313,965 | 5.27% | 19,244,283 | 5,621,326,903 | 43.73 | 97.82 | 93.36 | 88.68 | 11.93 |
| 7-2  | 21,142,666 | 4.94% | 20,098,325 | 5,865,254,377 | 43.89 | 98.08 | 93.97 | 89.12 | 13.00 |
| 7-3  | 28,885,014 | 2.88% | 28,054,099 | 8,211,182,640 | 43.91 | 98.32 | 94.29 | 90.27 | 15.19 |
| 7-4  | 19,829,566 | 6.14% | 18,612,909 | 5,409,982,188 | 43.40 | 98.16 | 94.42 | 88.40 | 11.45 |
| 7-5  | 19,866,569 | 4.55% | 18,962,818 | 5,558,116,923 | 43.58 | 98.33 | 94.76 | 88.95 | 12.91 |
| 7-6  | 18,062,821 | 6.04% | 16,971,248 | 4,936,085,287 | 43.70 | 97.65 | 93.01 | 88.11 | 10.73 |
| 7-7  | 21,000,165 | 5.94% | 19,752,858 | 5,629,388,355 | 43.87 | 98.07 | 94.14 | 88.16 | 11.61 |

|      |            |        |            |                |       |       |       |       |       |
|------|------------|--------|------------|----------------|-------|-------|-------|-------|-------|
| 7-8  | 21,435,915 | 6.37%  | 20,071,204 | 5,733,106,324  | 43.88 | 97.99 | 93.93 | 88.53 | 12.14 |
| 7-9  | 20,649,971 | 5.85%  | 19,442,153 | 5,650,506,512  | 43.59 | 98.11 | 94.22 | 88.72 | 12.37 |
| 7-10 | 21,309,204 | 5.13%  | 20,215,024 | 5,727,224,473  | 43.93 | 98.13 | 94.21 | 88.43 | 11.78 |
| 7-11 | 15,924,369 | 6.86%  | 14,832,191 | 4,288,683,503  | 43.58 | 98.10 | 94.31 | 86.99 | 9.42  |
| 7-12 | 18,507,080 | 6.42%  | 17,318,660 | 5,086,531,946  | 43.31 | 98.35 | 95.03 | 86.03 | 11.51 |
| 7-13 | 20,966,036 | 4.94%  | 19,931,234 | 5,800,648,973  | 43.60 | 98.02 | 93.79 | 89.20 | 13.08 |
| 7-14 | 21,066,488 | 4.75%  | 20,066,281 | 5,855,765,632  | 43.52 | 98.15 | 94.15 | 89.12 | 12.62 |
| 7-15 | 21,328,529 | 5.04%  | 20,253,388 | 5,863,224,864  | 43.68 | 98.19 | 94.35 | 88.94 | 12.37 |
| 8-1  | 19,180,651 | 5.02%  | 18,217,752 | 5,294,098,097  | 44.10 | 98.01 | 93.70 | 89.80 | 11.22 |
| 8-2  | 17,721,310 | 4.86%  | 16,860,275 | 4,876,182,975  | 43.86 | 98.06 | 93.80 | 87.50 | 10.68 |
| 8-3  | 21,572,762 | 4.40%  | 20,622,751 | 5,988,212,620  | 43.99 | 98.22 | 94.27 | 90.13 | 12.56 |
| 8-4  | 18,002,916 | 3.51%  | 17,370,312 | 5,059,189,761  | 43.99 | 98.09 | 93.73 | 88.05 | 11.32 |
| 8-5  | 19,296,976 | 4.36%  | 18,455,512 | 5,350,817,721  | 43.92 | 98.13 | 94.08 | 88.74 | 11.39 |
| 8-6  | 18,349,802 | 4.71%  | 17,485,669 | 5,042,916,699  | 44.23 | 97.76 | 93.00 | 88.30 | 10.97 |
| 8-7  | 19,437,932 | 7.62%  | 17,957,071 | 5,187,129,388  | 44.35 | 97.85 | 93.37 | 88.51 | 11.27 |
| 8-8  | 20,253,417 | 4.07%  | 19,429,902 | 5,635,977,745  | 44.10 | 98.27 | 94.39 | 89.24 | 12.15 |
| 8-9  | 19,330,829 | 5.49%  | 18,270,163 | 5,276,586,520  | 44.12 | 98.00 | 93.73 | 89.07 | 11.08 |
| 8-10 | 20,590,921 | 4.06%  | 19,754,211 | 5,689,729,123  | 44.12 | 98.31 | 94.52 | 88.96 | 12.20 |
| 8-11 | 19,683,825 | 2.97%  | 19,098,637 | 5,595,805,139  | 43.67 | 98.49 | 94.90 | 89.47 | 12.28 |
| 8-12 | 20,604,742 | 3.56%  | 19,871,730 | 5,782,041,691  | 44.28 | 98.36 | 94.60 | 88.99 | 12.68 |
| 8-13 | 17,583,303 | 4.51%  | 16,789,864 | 4,874,433,057  | 44.33 | 98.17 | 94.13 | 88.98 | 10.53 |
| 8-14 | 18,483,209 | 3.10%  | 17,909,878 | 5,235,972,250  | 44.55 | 98.31 | 94.37 | 87.87 | 11.85 |
| 8-15 | 19,836,848 | 4.70%  | 18,905,360 | 5,486,273,129  | 44.28 | 98.25 | 94.44 | 87.49 | 11.62 |
| 8-16 | 19,683,827 | 3.57%  | 18,981,062 | 5,561,151,339  | 44.47 | 98.07 | 93.71 | 88.67 | 12.33 |
| 8-17 | 19,410,885 | 4.57%  | 18,523,638 | 5,396,686,106  | 44.14 | 98.20 | 94.30 | 89.50 | 11.51 |
| 8-18 | 21,151,845 | 4.29%  | 20,244,350 | 5,900,239,260  | 44.46 | 98.20 | 94.20 | 89.28 | 12.88 |
| 8-19 | 19,019,457 | 2.30%  | 18,582,861 | 5,479,074,450  | 43.94 | 98.60 | 95.23 | 88.77 | 12.15 |
| 8-20 | 21,650,265 | 3.46%  | 20,901,816 | 6,086,125,791  | 44.11 | 98.34 | 94.54 | 89.99 | 13.05 |
| 8-21 | 19,720,327 | 3.15%  | 19,099,673 | 5,572,635,883  | 44.41 | 98.39 | 94.63 | 87.37 | 12.08 |
| 8-22 | 24,475,374 | 4.14%  | 23,462,870 | 6,879,154,998  | 44.10 | 98.16 | 94.03 | 90.41 | 12.82 |
| 8-23 | 21,075,184 | 5.50%  | 19,915,380 | 5,793,010,650  | 43.67 | 98.18 | 94.42 | 88.17 | 12.88 |
| 8-24 | 20,995,373 | 3.29%  | 20,305,028 | 5,917,003,045  | 44.25 | 98.25 | 94.23 | 89.94 | 13.00 |
| 9-1  | 19,886,393 | 4.78%  | 18,936,685 | 5,475,173,646  | 44.22 | 98.15 | 94.18 | 89.66 | 12.06 |
| 9-2  | 18,254,618 | 5.23%  | 17,299,580 | 5,033,883,396  | 44.04 | 98.21 | 94.45 | 87.96 | 11.22 |
| 9-3  | 18,665,158 | 4.11%  | 17,897,609 | 5,219,805,357  | 44.08 | 98.31 | 94.57 | 87.92 | 11.35 |
| 9-4  | 19,197,119 | 5.08%  | 18,222,372 | 5,300,312,164  | 44.13 | 97.38 | 92.09 | 88.53 | 11.68 |
| 9-5  | 19,024,170 | 3.93%  | 18,277,396 | 5,329,820,595  | 44.19 | 98.36 | 94.71 | 88.61 | 11.91 |
| 9-6  | 19,840,295 | 5.26%  | 18,796,613 | 5,465,104,983  | 44.02 | 98.15 | 94.20 | 88.31 | 11.91 |
| 9-7  | 19,523,704 | 4.38%  | 18,668,951 | 5,442,997,382  | 43.69 | 98.25 | 94.43 | 89.56 | 11.76 |
| 9-8  | 19,449,784 | 5.28%  | 18,422,774 | 5,335,178,154  | 44.10 | 98.15 | 94.24 | 89.77 | 11.60 |
| 9-9  | 24,456,153 | 4.38%  | 23,386,090 | 6,799,578,148  | 44.07 | 98.17 | 94.14 | 89.82 | 12.52 |
| 9-10 | 20,919,734 | 4.29%  | 20,023,061 | 5,833,078,783  | 44.08 | 98.20 | 94.20 | 89.67 | 12.87 |
| 9-11 | 38,768,239 | 4.64%  | 36,969,892 | 10,773,275,823 | 44.24 | 98.05 | 93.85 | 91.45 | 19.70 |
| 9-12 | 87,691,291 | 3.91%  | 84,261,886 | 24,521,631,173 | 44.39 | 98.13 | 93.98 | 91.29 | 44.77 |
| 9-13 | 19,777,916 | 3.74%  | 19,038,112 | 5,563,772,022  | 44.06 | 98.43 | 94.88 | 89.49 | 11.77 |
| 9-14 | 33,637,733 | 3.67%  | 32,403,094 | 9,404,948,246  | 44.22 | 98.28 | 94.35 | 90.46 | 17.34 |
| 9-15 | 37,536,440 | 10.46% | 33,611,912 | 9,643,070,350  | 43.86 | 97.82 | 93.76 | 90.87 | 17.18 |
| 9-16 | 65,355,444 | 8.80%  | 59,602,762 | 17,163,096,030 | 43.82 | 97.91 | 93.95 | 91.56 | 30.11 |

|      |            |        |            |                |       |       |       |       |       |
|------|------------|--------|------------|----------------|-------|-------|-------|-------|-------|
| 9-17 | 70,857,468 | 8.06%  | 65,149,516 | 18,817,455,345 | 43.65 | 98.04 | 94.27 | 90.77 | 32.89 |
| 9-18 | 35,956,607 | 9.94%  | 32,384,240 | 9,313,188,081  | 43.67 | 97.84 | 93.81 | 88.62 | 16.59 |
| 9-19 | 27,751,503 | 11.00% | 24,699,758 | 7,052,304,269  | 43.96 | 97.52 | 92.96 | 90.01 | 13.48 |

**Table S4:** Information of 44 common wild rice and 468 cultivated rice.

| Original sequence code | Group     | Name of landrace/MC cultivar/WDR line | Location        |
|------------------------|-----------|---------------------------------------|-----------------|
| R01                    | Wild Rice | R01                                   | Huilai          |
| R02                    | Wild Rice | R02                                   | Huilai          |
| R03                    | Wild Rice | R03                                   | Huilai          |
| R04                    | Wild Rice | R04                                   | Wuxuan          |
| R05                    | Wild Rice | R05                                   | Wuxuan          |
| R06                    | Wild Rice | R06                                   | Wuxuan          |
| R07                    | Wild Rice | R07                                   | Daling          |
| R08                    | Wild Rice | R08                                   | Daling          |
| R09                    | Wild Rice | R09                                   | Daling          |
| R10                    | Wild Rice | R10                                   | Nawu            |
| R11                    | Wild Rice | R11                                   | Nawu            |
| R12                    | Wild Rice | R12                                   | Nawu            |
| R13                    | Wild Rice | R13                                   | Xinpo           |
| R14                    | Wild Rice | R14                                   | Xinpo           |
| R15                    | Wild Rice | R15                                   | Xinpo           |
| R16                    | Wild Rice | R16                                   | Yangxi          |
| R17                    | Wild Rice | R17                                   | Yangxi          |
| R18                    | Wild Rice | R18                                   | Yangxi          |
| R19                    | Wild Rice | R19                                   | Tanlu           |
| R20                    | Wild Rice | R20                                   | Tanlu           |
| R21                    | Wild Rice | R21                                   | Tanlu           |
| R22                    | Wild Rice | R22                                   | Zhongshan       |
| R23                    | Wild Rice | R23                                   | Zhongshan       |
| R24                    | Wild Rice | R24                                   | Zhongshan       |
| R25                    | Wild Rice | R25                                   | Pengshan        |
| R26                    | Wild Rice | R26                                   | Pengshan        |
| R27                    | Wild Rice | R27                                   | Pengshan        |
| R28                    | Wild Rice | R28                                   | Chaling         |
| R29                    | Wild Rice | R29                                   | Chaling         |
| R30                    | Wild Rice | R30                                   | Chaling         |
| R31                    | Wild Rice | R31                                   | Jiangfeng       |
| R32                    | Wild Rice | R32                                   | Jiangfeng       |
| R33                    | Wild Rice | R33                                   | Jiangfeng       |
| R34                    | Wild Rice | R34                                   | Hainan          |
| R35                    | Wild Rice | R35                                   | Hainan          |
| R36                    | Wild Rice | R36                                   | Hainan          |
| R37                    | Wild Rice | R37                                   | Kuishan         |
| R38                    | Wild Rice | R38                                   | Kuishan         |
| R39                    | Wild Rice | R39                                   | Kuishan         |
| R40                    | Wild Rice | R40                                   | Fangcheng       |
| R41                    | Wild Rice | R41                                   | Fangcheng       |
| R42                    | Wild Rice | R42                                   | Yunnan Province |
| R44                    | Wild Rice | R44                                   | Dongxiang       |

| R45  | Wild Rice       | R45             | Dongxiang |
|------|-----------------|-----------------|-----------|
| W183 | Modern Cultivar | Huhan106        | NA        |
| W184 | Modern Cultivar | 17WJD154        | NA        |
| W185 | Modern Cultivar | 17WJD87         | NA        |
| W187 | Modern Cultivar | 17WJD133        | NA        |
| W188 | Modern Cultivar | 17WJD156        | NA        |
| W189 | Modern Cultivar | 17WJD77         | NA        |
| W190 | Modern Cultivar | 17WJD157        | NA        |
| W191 | Modern Cultivar | 17WJD153        | NA        |
| W192 | Modern Cultivar | 17WJD155        | NA        |
| W193 | Modern Cultivar | 17WJD62         | NA        |
| W194 | Modern Cultivar | 17WJD127        | NA        |
| W195 | Modern Cultivar | 17WJD142        | NA        |
| W196 | Modern Cultivar | 17WJD152        | NA        |
| W197 | Modern Cultivar | 17WJD83         | NA        |
| W198 | Modern Cultivar | 17WJD85         | NA        |
| W202 | Modern Cultivar | Longjing 21     | NA        |
| W203 | Modern Cultivar | Longjing 31     | NA        |
| W204 | Modern Cultivar | Longjing 46     | NA        |
| W205 | Modern Cultivar | Longjing 47     | NA        |
| W206 | Modern Cultivar | H13             | NA        |
| W207 | Modern Cultivar | H52             | NA        |
| W208 | Modern Cultivar | Bijing 42       | NA        |
| W209 | Modern Cultivar | Bijing 37       | NA        |
| W210 | Modern Cultivar | Ning 81         | NA        |
| W211 | Modern Cultivar | Zhejing 27      | NA        |
| W212 | Modern Cultivar | Zhejing 23      | NA        |
| W213 | Modern Cultivar | Yunjingyou 14   | NA        |
| W214 | Modern Cultivar | Ninghu i11      | NA        |
| W215 | Modern Cultivar | Ningjing 1      | NA        |
| W216 | Modern Cultivar | Xudao 8         | NA        |
| W217 | Modern Cultivar | Xuhan 1         | NA        |
| W218 | Modern Cultivar | Xu33202         | NA        |
| W219 | Modern Cultivar | Zhongdao 1      | NA        |
| W220 | Modern Cultivar | Zhongzuodao 2   | NA        |
| W221 | Modern Cultivar | Si2333          | NA        |
| W222 | Modern Cultivar | Huajing 8       | NA        |
| W223 | Modern Cultivar | Suken118        | NA        |
| W224 | Modern Cultivar | Zhendao 14      | NA        |
| W225 | Modern Cultivar | Changnongjing 7 | NA        |
| W226 | Modern Cultivar | Changnongjing 9 | NA        |
| W227 | Modern Cultivar | Wuyunjing 8     | NA        |
| W228 | Modern Cultivar | Wuyun3132       | NA        |
| W229 | Modern Cultivar | Yanjing 10      | NA        |
| W230 | Modern Cultivar | Nongken58       | NA        |
| W231 | Modern Cultivar | Yongjing18      | NA        |
| W342 | Modern Cultivar | 17WJD167        | NA        |
| W343 | Modern Cultivar | 17WJD166        | NA        |
| W344 | Modern Cultivar | 17WJD173        | NA        |
| W345 | Modern Cultivar | 17WJD119        | NA        |

|        |                 |                                |                   |
|--------|-----------------|--------------------------------|-------------------|
| W346   | Modern Cultivar | 17WJD103                       | NA                |
| W347   | Modern Cultivar | 17WJD97                        | NA                |
| W348   | Modern Cultivar | 17WJD56                        | NA                |
| W349   | Modern Cultivar | 17WJD95                        | NA                |
| W350   | Modern Cultivar | 17WJD65                        | NA                |
| W351   | Modern Cultivar | 17WJD121                       | NA                |
| W352   | Modern Cultivar | 17WJD159                       | NA                |
| W353   | Modern Cultivar | 17WJD161                       | NA                |
| W354   | Modern Cultivar | 17WJD177                       | NA                |
| W355   | Modern Cultivar | WJD175                         | NA                |
| W356   | Modern Cultivar | WJD171                         | NA                |
| W358   | Modern Cultivar | Huhan190                       | NA                |
| W360   | Modern Cultivar | Huhan 9                        | NA                |
| W361   | Modern Cultivar | Najing46                       | NA                |
| W362   | Modern Cultivar | Najing9108                     | NA                |
| W363   | Modern Cultivar | Qingxiangruanjing              | NA                |
| W364   | Modern Cultivar | Changlixiangjing               | NA                |
| W365   | Modern Cultivar | Xiushui 134                    | NA                |
| W366   | Modern Cultivar | WDR35                          | NA                |
| W367   | Modern Cultivar | Zaoyuxiangjing 2               | NA                |
| W369   | Modern Cultivar | Zaoyuxiangjing                 | NA                |
| W370   | Modern Cultivar | WDR61                          | NA                |
| W372   | Modern Cultivar | Zhonghan 3                     | NA                |
| W375ai | Modern Cultivar | WDR48                          | NA                |
| W376   | Modern Cultivar | Huhan 3                        | NA                |
| W379   | Modern Cultivar | Xiushui 123                    | NA                |
| A001   | Landrace        | Dahandao                       | Donghai County    |
| A013   | Landrace        | Fengrunsanbaili                | Fengrun County    |
| A019   | Landrace        | Changlixiaohongmang            | Changli County    |
| A026   | Landrace        | Fengningjingzi                 | Fengning County   |
| A028   | Landrace        | Huaianxiaodaozi (Bendidao)     | Huaian County     |
| A084   | Landrace        | Baixiangnuo                    | Jinping County    |
| A088   | Landrace        | Ruanlengshuigu                 | Jiangcheng County |
| A089   | Landrace        | Xiganmagu                      | Jiangcheng County |
| A090   | Landrace        | Luesuo                         | Luchun County     |
| A091   | Landrace        | Hongxinnuogu                   | Jiangcheng County |
| A103   | Landrace        | Cunsanli                       | Natong County     |
| A105   | Landrace        | Hannuodao                      | Huaiyin County    |
| A110   | Landrace        | Youmanghandao                  | Changshu County   |
| A111   | Landrace        | Youmangbaikehandao             | Changshu County   |
| A124   | Landrace        | Funingxiaobairen(Funinghandao) | Funing County     |
| A165   | Landrace        | NA(T02)                        | Baise County      |
| A169   | Landrace        | NA(T08)                        | Baise County      |
| A171   | Landrace        | NA(T10)                        | Baise County      |
| A173   | Landrace        | NA(T15)                        | Baise County      |
| A182   | Landrace        | Wutoumi                        | Shangcheng County |
| A184   | Landrace        | Huangkehandao                  | Runa County       |
| A189   | Landrace        | Mengdongnuo                    | Chengbu County    |
| A194   | Landrace        | Shunnuo                        | Xupu County       |
| A199   | Landrace        | Handaoxuan                     | Hunan province    |

|       |          |                      |                   |
|-------|----------|----------------------|-------------------|
| A201  | Landrace | Hanhe                | Hunan province    |
| A202  | Landrace | Nuoganhe             | Hunan province    |
| A209  | Landrace | Gannuohe             | Hunan province    |
| A213  | Landrace | Hongjiugu            | Yunnan Province   |
| IR004 | Landrace | SENSHO IBARZI        | Republic of Korea |
| IR005 | Landrace | AE DAE               | Republic of Korea |
| IR006 | Landrace | AE GUK               | Republic of Korea |
| IR009 | Landrace | GIN BOZU             | Japan             |
| IR010 | Landrace | BENKEI 1             | Japan             |
| IR011 | Landrace | SOMEWAKE             | Japan             |
| IR012 | Landrace | TAKAO MOCHI          | Japan             |
| IR013 | Landrace | FUSAKU SHIRASU SAI 1 | Japan             |
| IR014 | Landrace | HIKOTARO MOCHI       | Japan             |
| IR015 | Landrace | MITSURYU INE         | Japan             |
| IR016 | Landrace | MURASAKI INE         | Japan             |
| IR017 | Landrace | OURA                 | Japan             |
| IR018 | Landrace | SOMEWAKE             | Japan             |
| IR019 | Landrace | MUBO AIKOKU          | Japan             |
| IR020 | Landrace | CATETO BRANCO        | Brazil            |
| IR021 | Landrace | CANAIO               | Brazil            |
| IR023 | Landrace | POACEAE 388          | Japan             |
| IR024 | Landrace | POACEAE 391          | Japan             |
| IR025 | Landrace | IYO BENKEI 2         | Japan             |
| IR026 | Landrace | KOMYO NICHIKI 1      | Japan             |
| IR027 | Landrace | KOKURYO NIYAKO 1     | Japan             |
| IR028 | Landrace | HAYA SHINRIKI        | Japan             |
| IR029 | Landrace | BUPHOPA TY 26        | Myanmar           |
| IR030 | Landrace | BUTHE TY 18          | Myanmar           |
| IR031 | Landrace | KYWE BU THE          | Myanmar           |
| IR032 | Landrace | PATHEINWA TY 13      | Myanmar           |
| IR033 | Landrace | BEROD                | Indonesia         |
| IR034 | Landrace | CI 7214              | Indonesia         |
| IR035 | Landrace | CI 7217              | Indonesia         |
| IR036 | Landrace | CI 7224              | Indonesia         |
| IR037 | Landrace | BANKU                | India             |
| IR038 | Landrace | BASMATI              | India             |
| IR039 | Landrace | MAGSANA YA           | Philippines       |
| IR040 | Landrace | KINARABAO            | Philippines       |
| IR041 | Landrace | KINASTANO            | Philippines       |
| IR042 | Landrace | INITLOG DALAG        | Philippines       |
| IR043 | Landrace | PILENG BAYBAY        | Philippines       |
| IR045 | Landrace | KINANDANG PULA       | Philippines       |
| IR046 | Landrace | BUABO                | Philippines       |
| IR047 | Landrace | DUANG OJOY           | Philippines       |
| IR048 | Landrace | DUANG OJOY           | Philippines       |
| IR049 | Landrace | PINILING BAYBAY      | Philippines       |
| IR050 | Landrace | KINASTANO            | Philippines       |
| IR051 | Landrace | PINILI               | Philippines       |
| IR052 | Landrace | ALABANG 528          | Philippines       |
| IR053 | Landrace | PARAGA               | Philippines       |

|       |          |                         |                   |
|-------|----------|-------------------------|-------------------|
| IR054 | Landrace | DUMALI                  | Philippines       |
| IR055 | Landrace | MOROPOTOL               | Philippines       |
| IR056 | Landrace | MOROPOTOL SELECTION     | Philippines       |
| IR057 | Landrace | ALABANG 388             | Philippines       |
| IR058 | Landrace | MANUMBALAY              | Philippines       |
| IR059 | Landrace | KINABUGAN               | Philippines       |
| IR060 | Landrace | KIRAO SELECTION         | Philippines       |
| IR061 | Landrace | CADACAY                 | Philippines       |
| IR062 | Landrace | MAL WIT                 | Philippines       |
| IR063 | Landrace | MAL WIT                 | Philippines       |
| IR064 | Landrace | SINAMPABLO              | Philippines       |
| IR065 | Landrace | KINATUDAY               | Philippines       |
| IR066 | Landrace | LAMPADAN                | Philippines       |
| IR067 | Landrace | ER TER 1-SHIH HSING     | Philippines       |
| IR068 | Landrace | GUNGEN LANG SHUI PE     | Philippines       |
| IR069 | Landrace | GUINATA                 | Philippines       |
| IR070 | Landrace | BOENAR                  | Indonesia         |
| IR071 | Landrace | CHONG KUE TAE PYANG     | Republic of Korea |
| IR072 | Landrace | 3879                    | Thailand          |
| IR073 | Landrace | BINATANGAN              | Philippines       |
| IR074 | Landrace | PINAULA                 | Philippines       |
| IR075 | Landrace | R 21 S 5                | Senegal           |
| IR076 | Landrace | KINTUMAN                | Philippines       |
| IR077 | Landrace | JAOH                    | Liberia           |
| IR078 | Landrace | ELLIOTT                 | Liberia           |
| IR079 | Landrace | C 5561                  | Thailand          |
| IR080 | Landrace | C 5566                  | Thailand          |
| IR081 | Landrace | C 5568                  | Thailand          |
| IR083 | Landrace | KITAMOCHI               | Japan             |
| IR084 | Landrace | YUKIMOCHI               | Japan             |
| IR085 | Landrace | MI MASARI               | Japan             |
| IR086 | Landrace | CHIKAMA                 | Japan             |
| IR087 | Landrace | FUKUMINORI              | Japan             |
| IR088 | Landrace | NAKASENGOKU             | Japan             |
| IR089 | Landrace | ISAOMOCHI               | Japan             |
| IR091 | Landrace | PARAY LUPAW             | Philippines       |
| IR092 | Landrace | IFUGAO RICE             | Philippines       |
| IR093 | Landrace | IFUGAO RICE             | Philippines       |
| IR094 | Landrace | IFUGAO RICE             | Philippines       |
| IR095 | Landrace | FUKU SUKE               | Japan             |
| IR096 | Landrace | GO HYAKU MAN GOKU       | Japan             |
| IR097 | Landrace | CHUSEI SHIN SEMBON      | Japan             |
| IR098 | Landrace | UKON NISHIKI            | Japan             |
| IR099 | Landrace | WAKA BA                 | Japan             |
| IR100 | Landrace | SUECA                   | Brazil            |
| IR101 | Landrace | SECANO                  | Brazil            |
| IR102 | Landrace | MAGKASAR                | Philippines       |
| IR103 | Landrace | MIGA                    | Brazil            |
| IR104 | Landrace | SHANER 255-15 UPPER     | India             |
| IR105 | Landrace | KUMARICHIKARI 243-33-66 | India             |

|       |          |                           |                   |
|-------|----------|---------------------------|-------------------|
| IR106 | Landrace | ABOR RED B                | India             |
| IR107 | Landrace | AC 2533                   | India             |
| IR108 | Landrace | GIMBO 2                   | India             |
| IR109 | Landrace | KUMARICHIKARI 243-33-66   | India             |
| IR110 | Landrace | MUBO AIKOKU 22            | Japan             |
| IR111 | Landrace | ISHYIRO                   | Japan             |
| IR112 | Landrace | PI 6468                   | Japan             |
| IR113 | Landrace | PRECOZ VERDE              | Madagascar        |
| IR114 | Landrace | BALILLA                   | Madagascar        |
| IR115 | Landrace | MEQIGE-T                  | Philippines       |
| IR118 | Landrace | WARABEHATOMOCHI           | Japan             |
| IR119 | Landrace | CHIYOMINORI               | Japan             |
| IR120 | Landrace | GOGO DJOTO                | Indonesia         |
| IR121 | Landrace | A GA BYEO                 | Republic of Korea |
| IR122 | Landrace | A GU DO                   | Republic of Korea |
| IR123 | Landrace | AKUK DO                   | Republic of Korea |
| IR124 | Landrace | ALONG BYEO                | Republic of Korea |
| IR125 | Landrace | AN NA                     | Republic of Korea |
| IR126 | Landrace | AN NAM ZO                 | Republic of Korea |
| IR127 | Landrace | AN ZUN BAENG-I            | Republic of Korea |
| IR129 | Landrace | JA BOO AE                 | Thailand          |
| IR131 | Landrace | LAI DAWK DOO              | Thailand          |
| IR132 | Landrace | SIMANUK                   | Indonesia         |
| IR135 | Landrace | MIMASARANG                | Bangladesh        |
| IR137 | Landrace | AE GUK (AI KOKU)          | Brazil            |
| IR138 | Landrace | AGULHAO PRECOCE           | Brazil            |
| IR139 | Landrace | AHBAW C 408 (OS 4)        | Brazil            |
| IR140 | Landrace | AIMASARI 111              | Brazil            |
| IR141 | Landrace | AI YEH LU                 | Brazil            |
| IR142 | Landrace | AI YEH LU HWANG MIAO CHAN | Brazil            |
| IR143 | Landrace | AKEBONE 119               | Brazil            |
| IR144 | Landrace | ARDITO                    | Brazil            |
| IR145 | Landrace | ARK FORTUNA 155 SEL 54 P  | Brazil            |
| IR147 | Landrace | CANA ROXA                 | Brazil            |
| IR148 | Landrace | CATETO 4631-1-5           | Brazil            |
| IR149 | Landrace | CESARIOT 60               | Brazil            |
| IR150 | Landrace | CHACAREIRO                | Brazil            |
| IR151 | Landrace | CHAGAS 4                  | Brazil            |
| IR152 | Landrace | CHANG CHOW                | Brazil            |
| IR153 | Landrace | CHIANG TSENF TAO          | Brazil            |
| IR154 | Landrace | CHIBA-A-HO MOCHI          | Brazil            |
| IR155 | Landrace | CHING SHWEY PAI           | Brazil            |
| IR156 | Landrace | CHIN NA SU                | Brazil            |
| IR157 | Landrace | CHOKEY WASE               | Brazil            |
| IR158 | Landrace | CI 176-370                | Brazil            |
| IR159 | Landrace | CI 8633                   | Brazil            |
| IR160 | Landrace | CI 187091                 | Brazil            |
| IR161 | Landrace | CSOR NUY                  | Brazil            |
| IR162 | Landrace | CUME MON                  | Brazil            |
| IR163 | Landrace | DALILA                    | Brazil            |

|       |          |                              |                   |
|-------|----------|------------------------------|-------------------|
| IR165 | Landrace | EARLY ROSE                   | Brazil            |
| IR166 | Landrace | EGIPTIAN 2709                | Brazil            |
| IR167 | Landrace | 676205                       | Brazil            |
| IR168 | Landrace | ERO SHIMA                    | Brazil            |
| IR171 | Landrace | FITOTECNIA 3 (DNA FRANCISCA) | Brazil            |
| IR172 | Landrace | FURU WASE                    | Brazil            |
| IR173 | Landrace | GAE SEON                     | Brazil            |
| IR174 | Landrace | GIGANTE VERCELLI             | Brazil            |
| IR176 | Landrace | GIMBOZU                      | Brazil            |
| IR177 | Landrace | GUNEKI                       | Brazil            |
| IR178 | Landrace | HAN PU CHIN                  | Brazil            |
| IR180 | Landrace | HTSU MISHIKI 120             | Brazil            |
| IR181 | Landrace | HUCOCU MOCHI                 | Brazil            |
| IR182 | Landrace | HUNG CHAO LU YU              | Brazil            |
| IR183 | Landrace | IAS 22-8 PALMAR              | Brazil            |
| IR184 | Landrace | INDO YIALA LONICA            | Brazil            |
| IR185 | Landrace | IRGA 407                     | Brazil            |
| IR186 | Landrace | ISE ZINZA                    | Brazil            |
| IR187 | Landrace | KANOU                        | Brazil            |
| IR188 | Landrace | KOKKO                        | Brazil            |
| IR190 | Landrace | LACROSS                      | Brazil            |
| IR192 | Landrace | MIAOMICHIKI                  | Brazil            |
| IR193 | Landrace | MING CHANG WAN TAO KU        | Brazil            |
| IR194 | Landrace | MISUHO                       | Brazil            |
| IR195 | Landrace | MIYAGI AIKU                  | Brazil            |
| IR196 | Landrace | NAO TRADUZIDO 2              | Brazil            |
| IR197 | Landrace | NO ORDEM LISTA 2 (IC)        | Brazil            |
| IR198 | Landrace | NO ORDEM LISTA 91 (IC)       | Brazil            |
| IR199 | Landrace | ORKIKOM SHIROQUE             | Brazil            |
| IR200 | Landrace | PORTUGUESE                   | Brazil            |
| IR201 | Landrace | PROLIFIC                     | Brazil            |
| IR202 | Landrace | SEL WALDEMAR TERRES          | Brazil            |
| IR203 | Landrace | SEUCIRRE                     | Brazil            |
| IR204 | Landrace | STIRPE (NOVA)                | Brazil            |
| IR205 | Landrace | TAICHUNG 65-186              | Brazil            |
| IR206 | Landrace | VZ ROSZ 2831                 | Brazil            |
| IR207 | Landrace | WONG SON ZO 11               | Brazil            |
| IR208 | Landrace | 439                          | Brazil            |
| IR210 | Landrace | NGELEGOHUN                   | Sierra Leone      |
| IR212 | Landrace | AHGABYEO                     | Republic of Korea |
| IR216 | Landrace | KARABKAB (MALIKET)           | Philippines       |
| IR217 | Landrace | TOMOYUTAKA                   | Japan             |
| IR218 | Landrace | DOUKOUIN                     | Côte D'Ivoire     |
| IR221 | Landrace | LUPAO                        | Philippines       |
| IR222 | Landrace | IC 25705                     | India             |
| IR223 | Landrace | MONCA MANGGA                 | Indonesia         |
| IR224 | Landrace | MUTI NOEL                    | Indonesia         |
| IR225 | Landrace | NDALE EKO MUJA               | Indonesia         |
| IR229 | Landrace | ANJEUNBAENGI                 | Republic of Korea |
| IR230 | Landrace | BUE LAW PAE                  | Thailand          |

|            |          |                                  |                   |
|------------|----------|----------------------------------|-------------------|
| IR232      | Landrace | HOKU SETSU                       | Madagascar        |
| IR233      | Landrace | MADIRAT 237                      | Madagascar        |
| IR234      | Landrace | MADIRAT 240                      | Madagascar        |
| IR235      | Landrace | SUZUHARA MOCHI                   | Japan             |
| IR236      | Landrace | CHUGOKU 65                       | Japan             |
| IR237      | Landrace | FUKEI 111                        | Japan             |
| IR238      | Landrace | MANSAENG                         | Republic of Korea |
| IR240      | Landrace | WAENGCHALBYEO                    | Republic of Korea |
| IR241      | Landrace | KUNI ICHI                        | Japan             |
| IR242      | Landrace | OOKUWA NISHIKI                   | Japan             |
| IR243      | Landrace | KUROKA                           | Japan             |
| IR244      | Landrace | KUROKA MOCHI                     | Japan             |
| IR247      | Landrace | MOGAMI MOCHI 1                   | Japan             |
| IR248      | Landrace | MOGAMI URUCHI 1                  | Japan             |
| IR249      | Landrace | MUTSUKI                          | Japan             |
| IR251      | Landrace | EAN LICI                         | Brazil            |
| IR255      | Landrace | MON HANG                         | Lao PDR           |
| IR257      | Landrace | Mak kheua deng                   | Lao PDR           |
| IR258      | Landrace | BAY                              | Lao PDR           |
| SAGC039    | Landrace | Xingtaishijiangmi                | Xingtaishi        |
| SAGC041    | Landrace | Yefenghuang                      | Wujiang County    |
| SAGC131    | Landrace | Xiaobainuo2                      | Jinping County    |
| SAGC133    | Landrace | Lengshuiweigu                    | Jinping County    |
| SAGC165    | Landrace | Sanlicun                         | Yangzhou          |
| SAGC237    | Landrace | Milai                            | Baise County      |
| SAGC326    | Landrace | NA(T11)                          | Baise County      |
| SAGC377    | Landrace | Youxianzhan                      | Chaling           |
| SAGCLZ-002 | Landrace | Yuanhuanguo                      | Guizhou Province  |
| SAGCLZ-003 | Landrace | Danhuanguo                       | Guizhou Province  |
| SAGCLZ-004 | Landrace | Taohuanuo                        | Guizhou Province  |
| SAGCLZ-005 | Landrace | Xiaomike                         | Guizhou Province  |
| SAGCLZ-006 | Landrace | Yutianxiaohongmang               | Yutian County     |
| SAGCLZ-007 | Landrace | Qiananshuinuozi                  | Qianan County     |
| SAGCLZ-008 | Landrace | Lulongdabaimang                  | Lulong County     |
| SAGCLZ-009 | Landrace | Funingdahongmang                 | Funing County     |
| SAGCLZ-010 | Landrace | Qinhuangdaodahongmang            | Qinhuangdaoshi    |
| SAGCLZ-011 | Landrace | Luanxianxiaohongmang(Bendidaozi) | Luan County       |
| SAGCLZ-012 | Landrace | Weinahongmangdao                 | Fengna County     |
| SAGCLZ-013 | Landrace | Luannahongmangjingzi             | Luanna County     |
| SAGCLZ-014 | Landrace | Pingquanxiaolibai                | Pingquan County   |
| SAGCLZ-015 | Landrace | Longhuadahongpao                 | Longhua County    |
| SAGCLZ-016 | Landrace | Weixiandaheimang                 | Wei County        |
| SAGCLZ-017 | Landrace | Tangxiandalaoguan                | Tang County       |
| SAGCLZ-019 | Landrace | Wanjinxian                       | Wu County         |
| SAGCLZ-020 | Landrace | Changzixian                      | Wu County         |
| SAGCLZ-021 | Landrace | Zaoshiri                         | Wu County         |
| SAGCLZ-022 | Landrace | Hongdao                          | Wu County         |
| SAGCLZ-023 | Landrace | Fenghuangdao                     | Wu County         |
| SAGCLZ-024 | Landrace | Dadaotou                         | Wu County         |
| SAGCLZ-025 | Landrace | Manyedao                         | Kunshan County    |

|            |          |                       |                   |
|------------|----------|-----------------------|-------------------|
| SAGCLZ-026 | Landrace | Jinguhuang            | Kunshan County    |
| SAGCLZ-027 | Landrace | Daluohanhuang         | Changshu County   |
| SAGCLZ-028 | Landrace | Yangzhonggang         | Yixing County     |
| SAGCLZ-029 | Landrace | Baikeyuan             | Yixing County     |
| SAGCLZ-030 | Landrace | Youmangtieke          | Wujin County      |
| SAGCLZ-031 | Landrace | Baikeairihong         | Wujin County      |
| SAGCLZ-032 | Landrace | Cuganlizhihong        | Wu County         |
| SAGCLZ-033 | Landrace | Shangu                | Baise County      |
| SAGCLZ-034 | Landrace | Haoyongyi             | Ceheng County     |
| SAGCLZ-035 | Landrace | Haoxianling           | Ceheng County     |
| SAGCLZ-036 | Landrace | Baizhinuo             | Wangmo County     |
| SAGCLZ-037 | Landrace | Changmangzhan         | Ceheng County     |
| SAGCLZ-038 | Landrace | Changmanghuanghanzhan | Ceheng County     |
| SAGCLZ-039 | Landrace | Mangshang             | Ceheng County     |
| SAGCLZ-040 | Landrace | Maogu                 | Ceheng County     |
| SAGCLZ-042 | Landrace | Changmangchihexiannuo | Ceheng County     |
| SAGCLZ-043 | Landrace | Huaxianggu            | Ceheng County     |
| SAGCLZ-044 | Landrace | Hongmijing            | Ceheng County     |
| SAGCLZ-045 | Landrace | Chihehongmangjing     | Ceheng County     |
| SAGCLZ-046 | Landrace | Honghenuo             | Wangmo County     |
| SAGCLZ-047 | Landrace | Caopigu               | Jiangcheng County |
| SAGCLZ-048 | Landrace | Mowanggu              | Jiangcheng County |
| SAGCLZ-049 | Landrace | Huangkenuo            | Luchun County     |
| SAGCLZ-052 | Landrace | Jizinuo               | Jiangcheng County |
| SAGCLZ-053 | Landrace | Jiegunuo              | Jiangcheng County |
| SAGCLZ-054 | Landrace | Ludagu                | Jiangcheng County |
| SAGCLZ-055 | Landrace | Gaoshandigu           | Jinping County    |
| SAGCLZ-056 | Landrace | Jiudinuo              | Jiangcheng County |
| SAGCLZ-057 | Landrace | Zaobaiyi              | Yangzhou          |
| SAGCLZ-058 | Landrace | Niujaonuo             | Yangzhou          |
| SAGCLZ-059 | Landrace | Heikehannuo           | Yangzhou          |
| SAGCLZ-060 | Landrace | Youmangbaihandao      | Yangzhounongkesuo |
| SAGCLZ-061 | Landrace | Zaochadao             | Yangzhounongkesuo |
| SAGCLZ-062 | Landrace | Wanbaiyi              | Haimen County     |
| SAGCLZ-063 | Landrace | Erlibi                | Wu County         |
| SAGCLZ-064 | Landrace | Zaofeilafeng          | Taicang County    |
| SAGCLZ-065 | Landrace | Handao                | Yangzhong County  |
| SAGCLZ-066 | Landrace | Hongpishannuogu       | Baise County      |
| SAGCLZ-067 | Landrace | Baimangnuo            | Baise County      |
| SAGCLZ-068 | Landrace | Houxiasuинуogu        | Baise County      |
| SAGCLZ-069 | Landrace | Huapishannuo          | Baise County      |
| SAGCLZ-070 | Landrace | Daoliu                | Tianyang County   |
| SAGCLZ-071 | Landrace | Baxiandabaimang       | Ba County         |
| SAGCLZ-072 | Landrace | Wenaxiaohongmang I    | Wenan County      |
| SAGCLZ-073 | Landrace | Dingxiandaqingmang    | Ding County       |
| SAGCLZ-074 | Landrace | Quyangdadao           | Quyang County     |
| SAGCLZ-075 | Landrace | Kounong               | Baise County      |
| SAGCLZ-076 | Landrace | Heimangjing           | Baise County      |
| SAGCLZ-077 | Landrace | Wanmaojinggu          | Baise County      |
| SAGCLZ-078 | Landrace | Hanzhangu             | Baise County      |

|            |          |                          |                  |
|------------|----------|--------------------------|------------------|
| SAGCLZ-079 | Landrace | Houxian                  | Baise County     |
| SAGCLZ-080 | Landrace | Shanzhebaimaojinggu      | Baise County     |
| SAGCLZ-081 | Landrace | Baikeainuo               | Zhenfeng County  |
| SAGCLZ-082 | Landrace | Hanmaodao                | Anlong County    |
| SAGCLZ-083 | Landrace | Hetaonuo                 | Anlong County    |
| SAGCLZ-084 | Landrace | Maogu                    | Wangmo County    |
| SAGCLZ-085 | Landrace | Banbianuo                | Wangmo County    |
| SAGCLZ-086 | Landrace | Cungunuo                 | Ceheng County    |
| SAGCLZ-087 | Landrace | Danuo                    | Ceheng County    |
| SAGCLZ-088 | Landrace | Haoguangxun              | Ceheng County    |
| SAGCLZ-089 | Landrace | Zimangfeienuo            | Wangmo County    |
| SAGCLZ-090 | Landrace | Zihuake                  | Wangmo County    |
| SAGCLZ-091 | Landrace | NA(T01)                  | Baise County     |
| SAGCLZ-092 | Landrace | NA(T05)                  | Baise County     |
| SAGCLZ-093 | Landrace | NA(T06)                  | Baise County     |
| SAGCLZ-094 | Landrace | NA(T07)                  | Baise County     |
| SAGCLZ-095 | Landrace | NA(T14)                  | Baise County     |
| SAGCLZ-096 | Landrace | Hongzhangu               | Guizhou Province |
| SAGCLZ-097 | Landrace | Cunnuo                   | Guizhou Province |
| SAGCLZ-098 | Landrace | Fennuo                   | Guizhou Province |
| SAGCLZ-099 | Landrace | Xiaonuogu                | Guizhou Province |
| SAGCLZ-100 | Landrace | Hongyangwuhao            | Yunnan Province  |
| SAGCLZ-101 | Landrace | Yehezi                   | Guidong County   |
| SAGCLZ-102 | Landrace | Ganhenuo                 | Hunan            |
| SAGCLZ-103 | Landrace | Tonghenuo                | Wugang County    |
| SAGCLZ-104 | Landrace | Dubei                    | Tongdao County   |
| SAGCLZ-105 | Landrace | Danuo                    | Qianyang County  |
| SAGCLZ-106 | Landrace | Tuannuogu                | Sangzhi County   |
| SAGCLZ-107 | Landrace | Hongmangjiuyuenuo        | Huayuan County   |
| SAGCLZ-108 | Landrace | Zaohandao                | Hunan province   |
| SAGCLZ-109 | Landrace | Zaohe                    | Hunan province   |
| SAGCLZ-110 | Landrace | Hanhe                    | Hunan province   |
| SAGCLZ-111 | Landrace | Hangu                    | Hunan province   |
| SAGCLZ-112 | Landrace | Hanhe                    | Hunan province   |
| SAGCLZ-113 | Landrace | Hongkenuo                | Hunan province   |
| SAGCLZ-114 | Landrace | Bendihandao              | Hunan province   |
| SAGCLZ-115 | Landrace | Beizinuo                 | Yunnan Province  |
| SAGCLZ-116 | Landrace | Huagu                    | Yunnan Province  |
| W378       | Landrace | NA                       | NA               |
| X007-6     | Landrace | Ximazhan                 | Guizhou Province |
| X009-6     | Landrace | Huangkemi                | Guizhou Province |
| X010-6     | Landrace | Qianxixiaohongmang       | Qianxi County    |
| X011-6     | Landrace | Yutianxiaobaimang        | Yutian County    |
| X029-6     | Landrace | Gaoyangdiandaodahongmang | Gaoyang County   |
| X041-6     | Landrace | Xiangzhinuo              | Wu County        |
| X042-6     | Landrace | Toudengyishixing         | Jiangsu Province |
| X061-6     | Landrace | Baihanzhan               | Ceheng County    |
| X064-6     | Landrace | Haoyongli                | Ceheng County    |
| X070-6     | Landrace | Ziheichangmangjing       | Ceheng County    |
| X071-6     | Landrace | Dankenuo                 | Ceheng County    |

|        |          |                                     |                  |
|--------|----------|-------------------------------------|------------------|
| X077-6 | Landrace | Heikenuo                            | Wujin County     |
| X079-6 | Landrace | Heikenuo                            | Wujin County     |
| X106-6 | Landrace | Luhuadao                            | Pi County        |
| X117-6 | Landrace | Wuyanuo                             | Baise County     |
| X120-6 | Landrace | Baxianputaohong                     | Ba County        |
| X123-6 | Landrace | Fengrunhandaozi                     | Fengrun County   |
| X125-6 | Landrace | Funingxiaohongmang                  | Funing County    |
| X126-6 | Landrace | Qinhuangdaodangdihandao(Xiaobairen) | Qinhuangdaoshi   |
| X127-6 | Landrace | Qinglonghandao                      | Qinglong County  |
| X128-6 | Landrace | Xinglongwenzizui                    | Xinglong County  |
| X131-6 | Landrace | Rongchenghandaoxiaohongmang         | Rongcheng County |
| X132-6 | Landrace | Rongchenghandaozhongmangzi          | Rongcheng County |
| X133-6 | Landrace | Laiyuandadaozi                      | Laiyuan County   |
| X142-6 | Landrace | Hongkenuo                           | Qinglong County  |
| X149-6 | Landrace | Yangchennuo                         | Anlong County    |
| X153-6 | Landrace | Huakenuo (1)                        | Wangmo County    |
| X156-6 | Landrace | Cungunuo                            | Ceheng County    |
| X174-6 | Landrace | NA(T16)                             | Baise County     |
| X175-6 | Landrace | Yanzinuo                            | Yixing County    |

Note: raw data of these plant materials are on the NCBI Sequence Read Archive (SRA) under the accession number PRJNA260762.

**Table S5:** The value of Max Fst selected genes number and the distribution on chromosome of selected region in DXWR.

| Chr  | Start    | End      | Length | No of Selective genes | Max Fst |
|------|----------|----------|--------|-----------------------|---------|
| Chr2 | 1400001  | 1500000  | 100000 | 21                    | 0.577   |
|      | 2370001  | 2860000  | 490000 | 80                    | 0.584   |
|      | 4070001  | 4170000  | 100000 | 19                    | 0.567   |
|      | 35920001 | 36030000 | 110000 | 3                     | 0.558   |
|      | 15710001 | 15900000 | 190000 | 30                    | 0.571   |
| Chr3 | 16490001 | 16590000 | 100000 | 14                    | 0.556   |
|      | 24200001 | 24400000 | 200000 | 22                    | 0.61    |
|      | 33290001 | 33410000 | 120000 | 21                    | 0.591   |
|      | 34180001 | 34290000 | 110000 | 17                    | 0.607   |
| Chr4 | 21360001 | 21470000 | 110000 | 18                    | 0.567   |
| Chr5 | 1        | 290000   | 290000 | 57                    | 0.583   |
|      | 9120001  | 9460000  | 340000 | 53                    | 0.569   |
|      | 3040001  | 3810000  | 770000 | 134                   | 0.591   |
| Chr6 | 19520001 | 19720000 | 200000 | 35                    | 0.58    |
|      | 20700001 | 20900000 | 200000 | 30                    | 0.579   |
|      | 28440001 | 28570000 | 130000 | 29                    | 0.587   |
|      | 2180001  | 2830000  | 650000 | 88                    | 0.62    |
|      | 2940001  | 3350000  | 410000 | 54                    | 0.562   |
| Chr8 | 3570001  | 4480000  | 910000 | 147                   | 0.58    |
|      | 9020001  | 9290000  | 270000 | 46                    | 0.574   |
|      | 9680001  | 9810000  | 130000 | 19                    | 0.571   |
|      | 10350001 | 10700000 | 350000 | 54                    | 0.558   |
|      | 11690001 | 11960000 | 270000 | 40                    | 0.575   |
|      |          |          |        |                       |         |

---

|       |          |            |        |      |       |
|-------|----------|------------|--------|------|-------|
|       | 12250001 | 12430000   | 180000 | 19   | 0.563 |
|       | 13450001 | 13590000   | 140000 | 22   | 0.557 |
|       | 14270001 | 14640000   | 370000 | 67   | 0.565 |
|       | 15060001 | 15160000   | 100000 | 11   | 0.559 |
|       | 190001   | 320000     | 130000 | 20   | 0.573 |
| Chr9  | 2880001  | 3080000    | 200000 | 34   | 0.563 |
|       | 13000001 | 13100000   | 100000 | 13   | 0.556 |
| Chr12 | 23910001 | 24010000   | 100000 | 16   | 0.556 |
| Total |          | 31 regions |        | 1233 |       |

---
